## **Advanced Care Planning (ACP) in the early phase of COVID-19: A rapid review of the practice and policy lessons learned.**

*Sarah Younan<sup>1</sup>, Magnolia Cardona<sup>2</sup>, Ashlyn Sahay<sup>3</sup>, Eileen Willis<sup>3</sup>, Danielle Ni Chroinin<sup>1\*</sup>.*

1 Liverpool Hospital Department of Geriatric Medicine, Sydney, NSW Australia

2 Bond University, Institute for Evidence Based Healthcare, Gold Coast, QLD, Australia

3 Central Queensland University, Mackay, QLD, Australia

Corresponding author: [Danielle.Nichroinin@health.nsw.gov.au](mailto:Danielle.Nichroinin@health.nsw.gov.au)

Department of Geriatric Medicine, Liverpool Hospital,

Elizabeth St, Liverpool, NSW 2170, Australia

### **Abstract**

This rapid review of quantitative and qualitative publications of any design indexed in PUBMED between January 2020-April 2021 investigates barriers and enablers of advance care planning (ACP) worldwide in the early stages of the life-threatening COVID-19 pandemic. Seventy-four papers were included: 35 primary research studies (cohorts, reviews, case studies, and cross-sectional designs) and 39 commentaries. Publications from hospitals, outpatient services, aged care and community indicated widespread interest in accelerating ACP documentation to facilitate management decisions and goal-aligned care. Enablers of ACP included targeted public awareness, availability of telehealth, access to online tools and a person-centered approaches. Barriers included uncertainty regarding clinical outcomes, cultural or communication difficulties, legal and ethical considerations, infection control restrictions, lack of time, and limited resources and support systems. The opportunities for rapid implementation of ACP offered by the social distancing restrictions and high demand for health services are valuable in informing future policy and practice.

**NOTE: This preprint reports new research that has not been certified by peer review and should not be used to guide clinical practice.**

## Keywords

COVID-19; Advance Care Planning; Policy; Rapid Review; Barriers; Enablers

### What this paper adds

- Our study adds to existing evidence by identifying emerging barriers and creative ways of overcoming them in response to a global crisis
- Discussions on death prospects and care of the dying were feasible and a step towards normalisation of advance care planning
- Despite new and overwhelming challenges, policies and practices could be rapidly implemented to satisfy clinicians and families in need of advance care planning

### Applications of study findings

- The lessons learnt can be incorporated in future health service planning since the threat of other pandemics is real
- A formal evaluation of effectiveness of some of the emerging strategies would be a valuable addition to the evidence

Advance care planning (ACP) has come into sharp focus given the severe impacts of COVID-19 on the old and frail, and pandemic-associated strains on resources (Gupta et al., 2020; Onder et al., 2020; US Centers for Disease Control and Prevention, 2019; Vergano et al., 2020). ACP is “a process that supports adults at any age or stage of health in understanding and sharing their personal values, life goals, and preferences regarding future medical care”, aiming to ensure that medical care received is aligned with values and goals during serious and/or chronic illness (Sudore et al., 2017)

Pre-pandemic, rates of ACP were not high, with population-based estimates of ACP prevalence in Australia of 14% (White et al., 2014) but the US and UK reporting ACP engagement ~50%, documentation at 33% (Rao et al., 2014; Yadav et al., 2017). Rates of ACP may be lower in population subgroups: black, Asian and minority ethnicity, Lesbian Gay Bisexual Transgender Queer and Intersex, homeless and incarcerated persons and those with limited health literacy (Choi et al., 2020; Ekaireb et al., 2018; Harrison et al., 2016; Hughes &

Cartwright, 2015; Kaplan et al., 2020), while disability and female sex may increase ACP uptake (Block, Smith, et al., 2020).

We conducted a rapid review of the literature to explore how the COVID-19 pandemic may have influenced ACP implementation during the early stages of the crisis and investigate barriers and enablers of ACP in the COVID-19 context to inform future policy and practice.

## **Method**

Given the rapidly evolving nature of the COVID-19 pandemic, we adopted the WHO recommendation of using rapid reviews for the production of actionable evidence (World Health Organization Alliance for Health Policy and Systems Research, 2017).

### *Search strategy*

We searched PUBMED for the period January 2020-April 2021, using MeSH terms “advance care planning” /“advance directive” plus “COVID-19”/“sars-CoV-2”. We screened reference lists of identified peer-reviewed articles with a focus on ACP during COVID-19.

Inclusion and exclusion criteria. All study designs published were included. Preprints and Non-English language articles were excluded.

### *Study selection*

SY completed the literature search. MC and SY screened abstracts and reviewed all full texts. DNC, SY and MC reached consensus on all eligibility discrepancies. SY performed data extraction using a pre-defined table (author, publication year, country, study design, publication type, objectives, target population (if applicable), main conclusions). MC cross-checked eligibility for inclusion. Given a rapid review, we did not formally conduct quality appraisal and risk-of-bias assessment.

## Data Synthesis and Reporting

AS and EW reviewed data extraction tables and selected articles. Data were presented using simple descriptive statistics and tables complemented by a narrative synthesis.

## Results

Overall, 343 studies were screened, with 123 full-text papers assessed for eligibility. After full-text screening, 74 were included, comprising commentaries (39) or primary research studies (PRS) (35) (**Figure 1**).

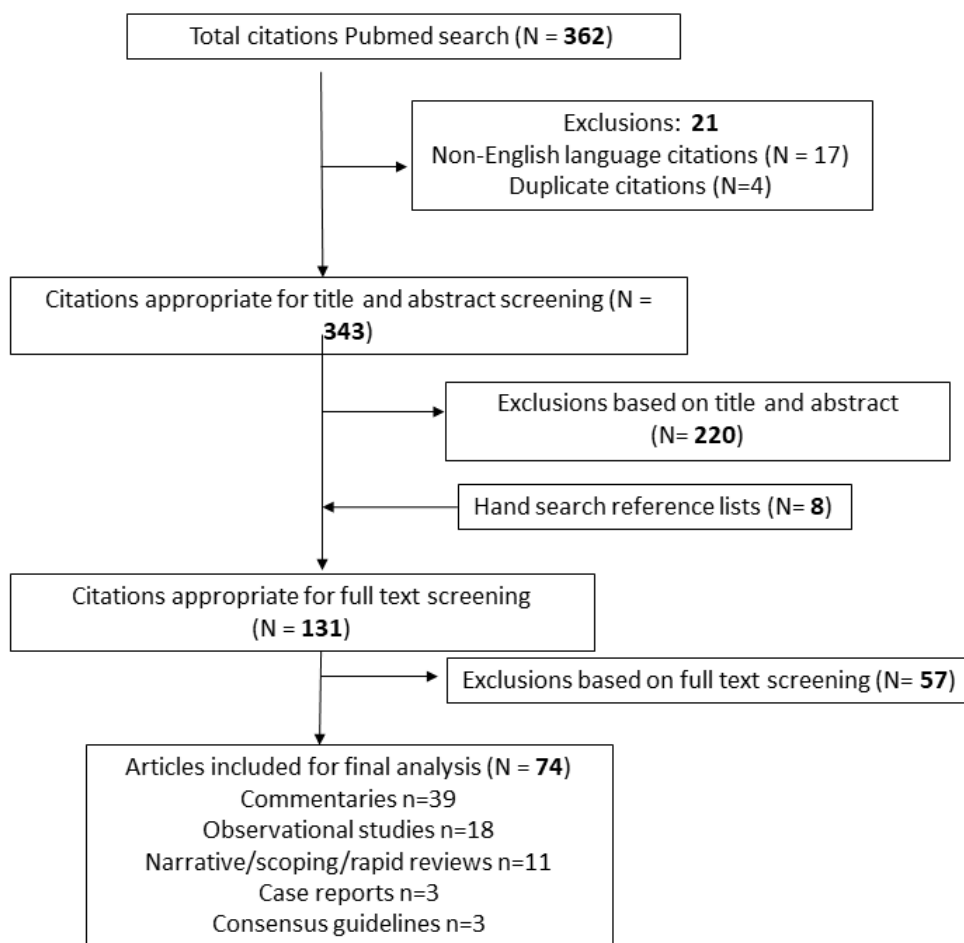

**Figure 1. PRISMA diagram of study screening and selection process**

Table 1 presents characteristics of included studies; [Supplement 1](#) gives further details. One-third (34%; n=12/35) of the PRS PRS focussed on older adults, the remainder (66%; n=23) targeting mixed age groups.

**Table 1: Article details for primary studies and commentaries**

|                                | Primary research<br>(n = 35) | Commentaries<br>(n = 39) |
|--------------------------------|------------------------------|--------------------------|
| <b>Country</b>                 |                              |                          |
| United States of America (USA) | 23                           | 26                       |
| United Kingdom (UK)            | 5                            | 5                        |
| India                          | 2                            | 1                        |
| Taiwan                         | 2                            | 0                        |
| Japan                          | 1                            | 0                        |
| Netherlands                    | 1                            | 0                        |
| South Africa                   | 1                            | 1                        |
| Australia                      | 0                            | 2                        |
| Canada                         | 0                            | 1                        |
| Italy                          | 0                            | 1                        |
| New Zealand (NZ)               | 0                            | 1                        |
| Singapore                      | 0                            | 1                        |
| <b>Study Design</b>            | -                            | 39                       |
| Commentaries                   | 9                            |                          |
| Cohort study – retrospective   | 8                            |                          |
| Cohort study – prospective     | 9                            |                          |
| Narrative Review               | 3                            |                          |
| Consensus Guidelines           | 1                            |                          |
| Rapid review                   | 1                            |                          |
| Scoping Review                 | 2                            |                          |
| Case Report                    | 1                            |                          |
| Case Series                    | 1                            |                          |
| Cross-sectional study          |                              |                          |

|                                    | <b>Primary research</b> | <b>Commentaries</b> |
|------------------------------------|-------------------------|---------------------|
|                                    | (n = 35)                | (n = 39)            |
| <b>Study participants/focus</b>    |                         |                     |
| Patients + Aged Care Clients       | 14                      |                     |
| Policy makers/Guidelines/Ethics    | 13                      |                     |
| General ACP users in the community | 4                       |                     |
| Clinicians only                    | 2                       |                     |
| Mixed: Clinicians + Patients       | 2                       |                     |

There was significant overlap of key discussion points across commentaries and PRS, with themes and sub-themes identified as in Table 2. We explore these themes below.

**Table 2: Emerging Themes and Sub-Themes.** IT=information technology

| <b>Overarching Themes</b>                         | <b>Sub-Themes</b>                                                                                                                                                                                                                                                                                                                                                                                                                                           |
|---------------------------------------------------|-------------------------------------------------------------------------------------------------------------------------------------------------------------------------------------------------------------------------------------------------------------------------------------------------------------------------------------------------------------------------------------------------------------------------------------------------------------|
| 1. Enablers of ACPs during COVID-19               | <ol style="list-style-type: none"> <li>1. Targeted public awareness and ACP engagement</li> <li>2. Online platforms and Telehealth programs to facilitate AP discussions</li> <li>3. Easy Access to online tools to guide ACP</li> <li>4. Person Centred Approach</li> </ol>                                                                                                                                                                                |
| 2. Barriers to ACP during COVID-19                | <ol style="list-style-type: none"> <li>1. Nature of the disease – acuity and uncertainty regarding clinical outcomes</li> <li>2. Cultural and Communication difficulties for patients and clinicians, including lack of facility with IT</li> <li>3. Legal and Ethical Considerations/Concerns</li> <li>4. Restrictions due to COVID infection control guidelines and procedures</li> <li>5. Availability of time, resources and support systems</li> </ol> |
| 3. Recommendations for effective delivery of ACPs | <ol style="list-style-type: none"> <li>1. Standardise ACP design and structure including online version access and e-health records</li> <li>2. A collaborative approach using multidisciplinary teams</li> <li>3. Increase Community ACP education/literacy</li> <li>4. Workshop training for clinicians</li> <li>5. Need to address legal and ethical issues</li> </ol>                                                                                   |

## *Enablers of ACPs during COVID-19*

*Targeted public awareness and ACP engagement.* Three studies noted that COVID-19 had increased awareness and importance of completing ACD and legal documentation relating to dying (Morrow-Howell et al., 2020; Portz et al., 2020); one commentator reported a 3.5 fold increase in ACP requests leading to a surge in palliative/supportive care services (Xu et al., 2021). Several commentaries highlighted that the media focus on COVID-19, daily mortality statistics, and stories of dying alone, brought ACP to the forefront of public attention and increased demand for ACPs (McAfee et al., 2020; Sinclair et al., 2020; Xu et al., 2021).

PRS indicated increasing emphasis on ACP for vulnerable groups, such as older adults (Berning et al., 2021; Biswas et al., 2020; Farrell, Ferrante, et al., 2020; Farrell, Francis, et al., 2020; Gilissen et al., 2020; Kotze & Roos, 2020; Kuzuya et al., 2020; Rivet et al., 2020; Valeri et al., 2020; Vipperman et al., 2021; West et al., 2021; Ye et al., 2021), and high-risk groups with pre-existing life-limiting and/or chronic conditions, such as HIV (Nguyen et al., 2021), cancer or organ failure (Biswas et al., 2020; Rivet et al., 2020; Salins et al., 2020), cardiovascular/cerebrovascular disease (Liao et al., 2020) or severe mental illness (Kotze & Roos, 2020). These recommendations were supported by commentaries (Reja et al., 2020) (Kluger et al., 2020), (Prost et al., 2021).

Commentaries noted that in many aged and acute care settings, ACP was recommended for all admissions (Desai et al., 2020; Gordon et al., 2020). Mooted options included sharing the ACP role with non-medical staff- social workers (Singh et al., 2020), nurses, or volunteers (Desai et al., 2020; Powell & Silveira, 2021; Xu et al., 2021). Some PRS highlighted the value of opportunistic ACP discussions, in outpatient clinics, (Lin et al., 2020; Mills et al., 2021) prior to surgery (Rivet et al., 2020) and/or at admission.

*Online Platforms and Telehealth programs facilitating ACP.* Clinicians, patients and families used on-line platforms and telehealth technology to facilitate ACP. Several PRS and commentaries reported on uptake of outreach telehealth services and/or tool development (Bender et al., 2021; Biswas et al., 2020; DeFilippis et al., 2020; Galbadage et al., 2020; Ho & Neo, 2021; Kuntz et al., 2020; Osterman et al., 2021; Reja et al., 2020).

Telehealth enabled socially/geographically isolated COVID-19 patients and carers to maintain contact with healthcare professionals (HCPs), engage in ACP conversations, seek psychological support and symptom management (Biswas et al., 2020; Kuntz et al., 2020; Moorman et al., 2020; Osterman et al., 2021). Telehealth also potentially offered benefits for those in financial difficulties (Osterman et al., 2021), facilitated family e-meetings (Kuntz et al., 2020; Piscitello et al., 2021) and enabled carers to engage in virtual farewells with dying patients (Bender et al., 2021; Chan et al., 2021; Dattolo et al., 2021; DeFilippis et al., 2020; Galbadage et al., 2020; Ho & Neo, 2021; Reja et al., 2020). Patients were reportedly relaxed in their home and more willing to engage in ACP discussions (Mills et al., 2021).

Telehealth communication reportedly increased satisfaction rates for clinicians and families (Kuntz et al., 2020). Telehealth aided ACP upskilling and education for clinicians. While clinician ability to initiate ACPs appeared unchanged, one study noted junior doctors' confidence decreased and anxiety in undertaking ACP rose, possibly a Kruger Dunning effect, where increasing skill acquisition may increase awareness of incompetence (Mills et al., 2021).

*Easy Access to online tools to guide ACP.* Both PRS and commentaries noted accessible online/web-based ACP tools facilitated the development or adaption of COVID-specific end-of-life resources (Auriemma et al., 2020; Gupta et al., 2021; Kluger et al., 2020; Morrow-Howell et al., 2020). Existing tools such as Serious Illness Conversation guide (Paladino et al., 2021) and



online workshops (Rabow et al., 2021; Smith et al., 2020) were adapted to context. Online users were relatively young (mean 48 years) and largely female (67%) (Portz et al., 2020). A narrative review (Gupta et al., 2021) also suggested that patient access to online health records facilitates ACP documentation.

*Person-centred approach.* Proponents of ACP argued that effective end-of-life care planning increased compliance with patient wishes and reduced depression and anxiety among bereaved relatives, respects human rights, prevents unnecessary hospital admissions and associated risk of dying alone (Desai et al., 2020; Ho & Neo, 2021; Sinclair et al., 2020).

Several narrative reviews suggested ACP should embrace a person-centred approach to care, involving “effective” or “adequate, sympathetic” communication (Gilissen et al., 2020), and culturally appropriate (West et al., 2021), respecting patients’ autonomy and reflecting their values, choices, and preferences (Farrell, Ferrante, et al., 2020; Gilissen et al., 2020; Rivet et al., 2020; West et al., 2021).

Studies highlighted the importance of identifying a patient’s surrogate decision-maker in emergency situations (Farrell, Ferrante, et al., 2020; Selman et al., 2020). A narrative review cautioned that firstly, critically ill COVID-19 patients may be ill-disposed to make their wishes known, and should not be pressured to make decisions based on conserving resources, and secondly, physicians should not pre-emptively ration or pressurise older adults to reconsider their ACP or resuscitation preferences due resource availability (Farrell, Ferrante, et al., 2020).

### *Barriers to ACP during COVID-19*

*Nature of the disease.* Both PRS and commentaries identified that the rapid evolution of COVID-19 and uncertain clinical outcomes impeded ACP (Adams, 2020; Back et al., 2020;

Ballantyne et al., 2020; Bender et al., 2021; Galbadage et al., 2020; Heyland, 2020; Janssen et al., 2020; Raftery et al., 2020) A lack of prognostic clarity and varied treatment responses delayed ACP (Janssen et al., 2020). Consensus guidelines, by the European Respiratory Society, reported that patients were too ill or anxious to participate in ACP, exacerbated by family absence. Rapid patient deterioration and/or clinical recovery added further complexity to timely discussions about ACPs and/or its currency (Janssen et al., 2020).

*Cultural and communication difficulties.* A narrative review reported that ACP language can become complex, which may impair communication and lead to inaccurate representation of patient goals (Gupta et al., 2021). Three studies noted that comprehension of ACP forms is influenced by health and literacy levels (Janssen et al., 2020; Lin et al., 2020; Selman et al., 2020), supported by several commentaries (Block, Smith, et al., 2020; Hughes & Vernon, 2021; McAfee et al., 2020; Paladino et al., 2021; Wallace et al., 2020; Xu et al., 2021). A rapid review identified an inverse relationship between ACP and socioeconomic status (SES) (West et al., 2021); with lack of trust in the healthcare system a point echoed in the commentaries (Chan, 2020; West et al., 2021).

Both PRS and commentaries highlighted that ACP uptake is lower in ethnic minorities or lower SES groups (Chan et al., 2021; Gupta et al., 2021; Hughes & Cartwright, 2015; Moore et al., 2020). For example, a narrative review (Gupta et al., 2021) identified that some minority groups may be more likely to appoint a formal ‘Next of Kin’, but less often document ACP, which may increase substitute decision maker burden. Commentary papers highlighted that minority groups lack familiarity with the health system, exacerbated by limited access and communication/language barriers (Block, Jeon, et al., 2020; Hughes & Cartwright, 2015; McAfee et al., 2020; Paladino et al., 2021; Wallace et al., 2020; Xu et al., 2021). Two narrative reviews highlighted potential cultural taboos on discussing death (Gupta et al., 2021; Selman et al., 2020), while a commentary from Sub-Saharan Africa- where ACP is not recognized- noted a focus on

efforts to ‘preserve’ life (Essomba et al., 2020). These views may change across generations or time, pointing to the importance of an individualised, patient-centred approach.

Families may also experience communication difficulties. Several commentators reported on family values, perceptions and understandings that differ from those of clinicians (Ballantyne et al., 2020; Chan et al., 2021; Chan, 2020; Fausto et al., 2020; Hopkins et al., 2020; Moore et al., 2020).

Clinicians were reminded that familial conflict may compound these differences (Moorman et al., 2020), and that individual preferences can change over time (Janwadkar & Bibler, 2020; Rosenberg et al., 2020). A US retrospective cohort study reported that families were more likely to change life support preferences when they attended in-person bed-side meetings, due to improved understanding of the patient’s condition/prognosis (Piscitello et al., 2021). Commentators also noted that not all population groups have ready access to, or facility with, communication technologies such as telehealth, which may be affected by language or SES (Hughes & Cartwright, 2015; Moore et al., 2020).

Clinicians also experience barriers, for example lack of confidence in communicating bad news (Gupta et al., 2021) and difficulties in making speech heard when wearing personal protective equipment (PPE) (Selman et al., 2020). These barriers ranged from difficulties initiating ACP discussions with patients/families (Gupta et al., 2021; Selman et al., 2020) to concerns surrounding topic sensitivity and family grief (Janssen et al., 2020; Lin et al., 2020; Selman et al., 2020). For example, clinicians may delay end-of-life conversations, reluctant to ‘take away’ hope when prognosis is uncertain. A European Taskforce suggested a constant review process will maintain alignment of ACP to the patient’s evolving condition (Janssen et al., 2020). Three PRS and several commentaries recommended the need for clinician ACP training and access to palliative care education (Gupta et al., 2021; Janssen et al., 2020; Selman et

al., 2020). Mitigating strategies proposed included ACP integration at all training levels (McAfee et al., 2020), specific frameworks such as VitalTalk (Back et al., 2020) or other conversation guides to ensure equitable access and goal-aligned management (Desai et al., 2020; Essomba et al., 2020; Prost et al., 2021), and ACP upskilling for allied health providers (Raftery et al., 2020).

*Legal and Ethical Considerations.* ACP laws and guidelines differ across countries and jurisdictions. Difficulties range from accessing lawyers (Chan, 2020), to differing legal terminology (Block, Smith, et al., 2020), to identifying who is entitled to initiate conversations. In some jurisdictions, only medical staff may initiate ACP conversations, with limited/no input from other multidisciplinary team members (Raftery et al., 2020; Singh et al., 2021). A large cohort study conducted in the US, found engaging social workers in ACP resulted in a 13% increase in patients nominating a medical POA (Singh et al., 2021).. A Taiwanese study noted local legal obligations to have two witnesses and associated costs might impede ACP (Lin et al., 2021). A narrative review during the pandemic (Gilissen et al., 2020) identified seven documents that described core ACP issues to be discussed with nursing home residents: POA (Enduring Guardian equivalent), cardiopulmonary resuscitation (CPR), admission to hospital, intubation, non-invasive ventilation, fluids, antibiotics, etc. Supplement 1 includes related resources, including a position statement .

A Canadian commentary argued that ACPs are less useful for COVID-19, lacking situational value, and difficulty fully informing individuals regarding treatment options, benefits and risks (Heyland, 2020). They suggest patients should rather be asked about values, noting that ethical and legal issues are of serious concern during a pandemic. Another commentary reported that some standardized protocols, e.g. in the UK, suggested that

residential aged-care residents should not be admitted to hospitals (Iacobucci, 2020). Such “one-size fits-all” approaches contradict the uniqueness of individual presentations (Iacobucci, 2020).

A US consensus guideline highlighted encouraged decision makers to focus on short-term outcomes and avoid age alone as a determinant of care. Other recommendations included avoiding ancillary criteria such as predicted long-term life expectancy (disadvantages elderly), formation of triage committees and development of transparent resource-allocation strategies to facilitate appropriate ACP (Farrell, Ferrante, et al., 2020).

*Restrictions due to COVID infection control procedures.* Almost all studies identified that COVID-related restrictions impacted peoples’ ability to connect with clinicians and access ACP-related support. Infection control protocols governing the spread of COVID (social distancing, mask-wearing) impacted on communication between patients, families and HCPs. This, in turn, decreased the uptake of ACPs as outlined in PRS (Coleman et al., 2020; Janssen et al., 2020; Lin et al., 2021) and commentaries (Gordon et al., 2020; Paladino et al., 2021). For example, a UK based cohort study identified a decline (from 75.4% to 50.6%) in Do-Not-Attempt-Cardiopulmonary-Resuscitation due to restricted family visiting (Coleman et al., 2020). The use of PPE and restricted visiting were hurdles to building trust required for effective ACP discussions (Mills et al., 2021); (Janssen et al., 2020). These findings were ratified overwhelmingly by the commentaries (Adams, 2020; Ballantyne et al., 2020; Bender et al., 2021; Block, Jeon, et al., 2020; Chan et al., 2021; Ho & Neo, 2021; Hopkins et al., 2020; Janwadkar & Bibler, 2020; Moorman et al., 2020; Wallace et al., 2020; Xu et al., 2021).

Lack of interpersonal access increased family and patient distrust/suspicion towards HCPs (Moore et al., 2020), and/or the healthcare system (Gordon et al., 2020), [85]. Isolation, travel restrictions, and visitor limitations made shared decision-making extremely difficult.

This was seen from the potentially-dying patient deprived of in-person visits (Adams, 2020; Ballantyne et al., 2020; Bender et al., 2021; Galbadage et al., 2020; Gordon et al., 2020; Moorman et al., 2020; Paladino et al., 2021; Wallace et al., 2020), to feelings of being abandoned by medical staff (Janwadkar & Bibler, 2020). Stigma surrounding COVID, reinforced by the infection control protocols, exacerbated these difficulties and created barriers to ACP (Essomba et al., 2020).

*Lack of time, resources and support systems.* ACP was identified as enabling fairer and more transparent resource allocation during periods of constraint, potentially reducing unnecessary life-sustaining treatments and streamlining the use of intensive care resources (Farrell, Francis, et al., 2020; Gupta et al., 2020; Liao et al., 2020; Salins et al., 2020). This was seen to alleviate the need for healthcare rationing, by avoiding aggressive treatment for those who do not want it, engaging patients in shared-decision making and avoiding blanket decisions based on age or comorbidity. Four commentaries noted that ACP also reduced clinician exposure to avoidable infection and risk (e.g. with CPR), and assisted in planning for surges in healthcare demand (Ho & Neo, 2021; Rosenberg et al., 2020; Sinclair et al., 2020; Xu et al., 2021).

Nonetheless, ACP was recognised to be time intensive. Several PRS highlighted that clinicians are time poor, with little time for lengthy discussions or to develop clinician-patient relationships and trust (Gilissen et al., 2020; Gupta et al., 2021; Liao et al., 2020; Salins et al., 2020; Selman et al., 2020). Numerous commentaries supported this finding (Ballantyne et al., 2020; Bender et al., 2021; Janwadkar & Bibler, 2020; Moore et al., 2020; Paladino et al., 2021; Raftery et al., 2020; Wallace et al., 2020). Commentators noted a lack of appropriate policies highlighting ACP's importance, a failure to prioritize it (Adams, 2020; Back et al., 2020; Bender et al., 2021;

Chan et al., 2021; Ho & Neo, 2021), and either poor or overly-cumbersome documentation, as well as failure to remunerate appropriately e.g. with dedicated billing codes (Bender et al., 2021).

Requests for ACP have reportedly increased since the pandemic across varied settings: aged-care, terminal neurological patients, and prisons (Bolt et al., 2021; Desai et al., 2020; Gordon et al., 2020; Kluger et al., 2020; Lin et al., 2020; Morrow-Howell et al., 2020; Prost et al., 2021; West et al., 2021), with goals of care discussions ranging from 36% (Piscitello et al., 2021) to a 3.5-fold increase (Xu et al., 2021).

## Recommendations for effective ACP delivery

*ACP design and structure.* Various commentators suggested a need to develop or adapt tools specifically to the COVID context (Kluger et al., 2020; Morrow-Howell et al., 2020), and to deliver small chunks of information given the emotional impact of the diagnosis (Back et al., 2020; Block, Smith, et al., 2020; Hopkins et al., 2020; Singh et al., 2020). Three editorials suggested current ACP tools are targeted towards non-communicable chronic illnesses rather than the COVID experience (Ballantyne et al., 2020; Moore et al., 2020; Moorman et al., 2020). Others provided specific ACP tools, approaches or frameworks (Gaur et al., 2020; Paladino et al., 2021; Roberts et al., 2020). Similar suggestions were made in PRS, but specific recommendations for design and structure of ACPs were limited.

*A collaborative approach.* Multidisciplinary collaboration was encouraged, guided by specialists trained in ACP or palliative care (Berning et al., 2021; Bolt et al., 2021; Powell & Silveira, 2021), although noting that specialist teams are not universally available (Prost et al., 2021). Other suggestions included that non-medical team-members should assist with ACP, e.g. nurses and social workers (Desai et al., 2020; Raftery et al., 2020), or spiritual carers (Xu et

al., 2021). Frameworks and tools were seen to address such concerns and to improve clinician confidence (Desai et al., 2020; Prost et al., 2021; Singh et al., 2020). A commentary suggested that interpersonal barriers of social distancing could be overcome by increasing pre-illness ACP discussions (Ballantyne et al., 2020).

*Increase Community ACP education/literacy.* The importance of promoting and increasing ACP education and literacy for the wider community was frequently recognised (Janssen et al., 2020; McAfee et al., 2020; McMahan et al., 2021; Selman et al., 2020; Singh et al., 2020), including relationship-building with community, ethnic and religious groups (Hughes & Vernon, 2021; Xu et al., 2021).

One commentary suggested that hospital-based policies, jurisdictional legislation and community campaigns needed to accompany the broadening ACP education for HCPs (Raftery et al., 2020). Death education/literacy may be best embedded across all health curriculum levels (McAfee et al., 2020). Other options proposed included templates and tools to facilitate ACPs, videos and telehealth to facilitate remote ACP, and creation of an integrated web-based system linked to electronic medical records (eMR) to facilitate ACP in the community (Galbadage et al., 2020; McMahan et al., 2021; Portz et al., 2020; Selman et al., 2020; Smith et al., 2020).

Several other studies indicated a need to promote ACP literacy, but specific strategies were lacking (Auriemma et al., 2020; Funk et al., 2020; Kuzuya et al., 2020; Lin et al., 2021).

*Training for clinicians.* Upskilling clinicians to improve ACP confidence was a recurring theme, highlighted by at least two narrative reviews (Gupta et al., 2021; Selman L et al., 2020) and a consensus guideline (Janssen et al., 2020). Proposed teaching strategies were varied, e.g. role-play, interactive multimedia, virtual training, online communication, and telephone



debriefing (McMahan et al., 2021; Mills et al., 2021). One review suggested that training HCPs in assisted living communities could help communication across services (Vipperman et al., 2021).

*Need to address legal and ethical issues.* Legal and ethical issues featured predominantly in commentaries. Suggestions included temporarily pausing stricter legal requirements for ACP during COVID (Block, Smith, et al., 2020). Several studies addressed resource utilization and most studies argued that ACP should be prioritized to reduce unwanted intensive/life-sustaining treatment in a stretched healthcare system (Curtis et al., 2020). Clinician concerns regarding the ethics of CPR in COVID-19 patients were also noted (DeFilippis et al., 2020). Nevertheless, one institution highlighted that resource availability and patient/family goals of care need to be balanced when making resuscitation decisions (Fausto et al., 2020).

## **Discussion**

This rapid review of ACP implementation in the initial phase of the pandemic (until April 2021) suggests a high level of worldwide interest since COVID emerged. ACP may benefit overwhelmed healthcare systems, and decision-making for patients, caregivers and clinicians, and improve bereavement experiences. A sense of urgency and eagerness to make recommendations was apparent, often without supporting high-quality evidence (39 commentaries, 3 consensus guidelines and 3 case series/reports). Most publications were from the USA and UK — severely affected countries but also resourced to produce and promote research. Settings spanning acute hospitals, community, aged care and outpatient services showcased the breadth of the locations affected. We were not surprised by the focus on barriers and enablers of ACP during the pandemic. The variety of proposed solutions was reassuring in

terms of timeliness and feasibility, with standardization, collaboration, education and ethical-legal considerations underpinning implementation into practice.

Two main lessons surfaced from this rapid review. First, the prevalence and clarity of goals of care discussions were often touched on as a priority issue for patient management, prevention of unwanted (non-goal-aligned) care, or transfer decisions, across the range of study types ((Bolt et al., 2021; Burke et al., 2020; Gupta et al., 2021; Kuntz et al., 2020; Liao et al., 2020; Piscitello et al., 2021; Salins et al., 2020; Viperman et al., 2021)(Nguyen et al., 2021). Next, frequent references to online tools or resources (Auriemma et al., 2020; Gaur et al., 2020; Paladino et al., 2021; Portz et al., 2020; Selman L et al., 2020) and virtual learning for clinicians and families including online family meetings (Gupta et al., 2021; Janssen et al., 2020; Kuntz et al., 2020; Mills et al., 2021; Piscitello et al., 2021; Rabow et al., 2021; Smith et al., 2020), reflect rapid embracing of innovative approaches to facilitate ACP completion and circumvent face-to-face interactions. Both are reassuring findings which indicate that patient/family wishes on end-of-life care were not neglected in the chaos of the unanticipated demand for health services, although frequency and equity of access were not always optimal (Gupta et al., 2021; Piscitello et al., 2021), and absence of communication was perceived to lead to complex bereavement (Carr et al., 2020; Selman et al., 2020).

A poignant aspect of COVID-19 was the vision of people dying in alone in hospital, unable to be with family and suffering respiratory discomfort. For families, this led to a complicated grief experience characterized by survivor guilt, anger and distress. An obvious mitigating strategy was to increase ACP so all stakeholders were prepared, patients received the care they desired and symptoms were managed in line with individualised goals (Carr et al., 2020; Cavalier et al., 2020; Desai et al., 2020; Hughes & Vernon, 2021; Janwadkar & Bibler, 2020).

## Implications for practice

Our pandemic-related experience has pushed us to re-evaluate existing healthcare policies and practices, overcome new and longstanding barriers, and embrace new solutions, in ACP as in other areas of practice. This review suggests the pandemic has provided some impetus to drive adaptable ACP conversations at individual, local, and international levels, affording an opportunity for longer term improvements in ACP practice and care that is respectful of, and responsive to, the values and needs of the individual patients we meet every day.

## Limitations of the review

Given the nature of a rapid review, we only used limited number of terms, confined to searching English language publications in the early stages of the pandemic and from a single (but the largest) database anticipated to contain the majority of relevant articles. Half of the publications reflected perception, early reactions and proposed solutions and were not interventions or evaluations of policies or practices. Our intention was to illustrate all perspectives given the uniqueness of this serious pandemic experience. A future review of subsequent publications in the late stages of the review may report similar or different findings and it would be interesting to compare our results with emerging lessons after longer exposure to the global threat.

## Conclusion

Despite high demand for healthcare services, the pandemic provided opportunities for rapid implementation of ACP. Both barriers and enablers of ACP influence its uptake Evidence suggests clinicians, patients and families support the cultural shift that fosters positive ACP

uptake; this may contribute to reduced overtreatment near end of life. Ongoing evaluation of policy changes, effectiveness and acceptability are warranted.

### **Acknowledgments**

The authors thank our institutional librarians for their assistance finding full texts.

### **Conflict of Interest**

The authors declare no financial or other actual or perceived conflicts of interest in this work.

### **Funding**

This study received no funding from any government, commercial or no-for-profit sources.

### **Ethical approval**

Not relevant to this methodology.

## REFERENCES

- Adams, C. (2020). Goals of Care in a Pandemic: Our Experience and Recommendations. *J Pain Symptom Manage*, 60(1), e15-e17. <https://doi.org/10.1016/j.jpainsymman.2020.03.018>
- Auremma, C. L., Halpem, S. D., Asch, J. M., Van Der Tuyn, M., & Asch, D. A. (2020). Completion of Advance Directives and Documented Care Preferences During the Coronavirus Disease 2019 (COVID-19) Pandemic [Research Support, N.I.H., Extramural]. *JAMA Network Open*, 3(7), e2015762. <https://doi.org/https://dx.doi.org/10.1001/jamanetworkopen.2020.15762>
- Back, A., Tulskey, J. A., & Arnold, R. M. (2020). Communication Skills in the Age of COVID-19. *Ann Intern Med*, 172(11), 759-760. <https://doi.org/10.7326/M20-1376>
- Ballantyne, A., Rogers, W. A., Entwistle, V., & Towns, C. (2020). Revisiting the equity debate in COVID-19: ICU is no panacea. *J Med Ethics*, 46(10), 641-645. <https://doi.org/10.1136/medethics-2020-106460>
- Bender, M., Huang, K. N., & Raetz, J. (2021). Advance Care Planning During the COVID-19 Pandemic. *Journal of the American Board of Family Medicine: JABFM*, 34(Suppl), S16-S20. <https://doi.org/https://dx.doi.org/10.3122/jabfm.2021.S1.200233>
- Berning, M. J., Palmer, E., Tsai, T., Mitchell, S. L., & Berry, S. D. (2021). An advance care planning long-term care initiative in response to COVID-19. *J Am Geriatr Soc*, 69(4), 861-867. <https://doi.org/10.1111/jgs.17051>
- Biswas, S., Adhikari, S. D., & Bhatnagar, S. (2020). Integration of Telemedicine for Home-Based End-of-Life Care in Advanced Cancer Patients during Nationwide Lockdown: A Case Series. *Indian J Palliat Care*, 26(Suppl 1), S176-s178. [https://doi.org/10.4103/ijpc.Ijpc\\_174\\_20](https://doi.org/10.4103/ijpc.Ijpc_174_20)
- Block, B. L., Jeon, S. Y., Sudore, R. L., Matthay, M. A., Boscardin, W. J., & Smith, A. K. (2020). Patterns and Trends in Advance Care Planning Among Older Adults Who Received Intensive Care at the End of Life. *JAMA Internal Medicine*, 180(5), 786-789. <https://doi.org/10.1001/jamainternmed.2019.7535>
- Block, B. L., Smith, A. K., & Sudore, R. L. (2020). During COVID-19, Outpatient Advance Care Planning Is Imperative: We Need All Hands on Deck. *J Am Geriatr Soc*, 68(7), 1395-1397. <https://doi.org/10.1111/jgs.16532>
- Bolt, S. R., van der Steen, J. T., Mujezinović, I., Janssen, D. J. A., Schols, J., Zwakhalen, S. M. G., Khemai, C., Knapen, E., Dijkstra, L., & Meijers, J. M. M. (2021). Practical nursing recommendations for palliative care for people with dementia living in long-term care facilities during the COVID-19 pandemic: A rapid scoping review. *Int J Nurs Stud*, 113, 103781. <https://doi.org/10.1016/j.ijnurstu.2020.103781>
- Burke, R. V., Rome, R., Constanza, K., Amedee, M., Santos, C., & Leigh, A. (2020). Addressing Palliative Care Needs of COVID-19 Patients in New Orleans, LA: A Team-Based Reflective Analysis. *Palliat Med Rep*, 1(1), 124-128. <https://doi.org/10.1089/pmr.2020.0057>
- Carr, D., Boerner, K., & Moorman, S. (2020). Bereavement in the Time of Coronavirus: Unprecedented Challenges Demand Novel Interventions. *Journal of Aging & Social Policy*, 32(4-5), 425-431. <https://doi.org/10.1080/08959420.2020.1764320>
- Cavalier, J. S., Maguire, J. M., & Kamal, A. H. (2020). Beyond Traditional Advance Care Planning: Tailored Preparedness for COVID-19 [Letter]. *Journal of Pain & Symptom Management*, 60(5), e4-e6. <https://doi.org/https://dx.doi.org/10.1016/j.jpainsymman.2020.08.020>
- Chan, E. Y. Y., Dubois, C., Fong, A. H. Y., Shaw, R., Chatterjee, R., Dabral, A., Loyzaga, A., Kim, Y. K., Hung, K. K. C., & Wong, C. S. (2021). Reflection of Challenges and Opportunities within the COVID-19 Pandemic to Include Biological Hazards into DRR Planning. *Int J Environ Res Public Health*, 18(4). <https://doi.org/10.3390/ijerph18041614>
- Chan, H. Y. (2020). The Underappreciated Role of Advance Directives: How the Pandemic Revitalises Advance Care Planning Actions. *European Journal of Health Law*, 27(5), 451-475. <https://doi.org/https://dx.doi.org/10.1163/15718093-BJA10029>
- Choi, S., McDonough, I. M., Kim, M., & Kim, G. (2020). The association between the number of chronic health conditions and advance care planning varies by race/ethnicity. *Aging Ment Health*, 24(3), 453-463. <https://doi.org/10.1080/13607863.2018.1533521>

- Coleman, J. J., Botkai, A., Marson, E. J., Evison, F., Atia, J., Wang, J., Gallier, S., Speakman, J., & Pankhurst, T. (2020). Bringing into focus treatment limitation and DNACPR decisions: How COVID-19 has changed practice. *Resuscitation*, *155*, 172-179. <https://doi.org/10.1016/j.resuscitation.2020.08.006>
- Curtis, J. R., Kross, E. K., & Stapleton, R. D. (2020). The importance of addressing advance care planning and decisions about do-not-resuscitate orders during novel coronavirus 2019 (COVID-19). *JAMA*, *323*(18), 1771-1772.
- Dattolo, P. C., Toccafondi, A., & Somma, C. (2021). COVID-19 Pandemic: A Chance to Promote Cultural Sensitivity on Advance Care Planning. *J Palliat Med*. <https://doi.org/10.1089/jpm.2020.0796>
- DeFilippis, E. M., Ranard, L. S., & Berg, D. D. (2020). Cardiopulmonary Resuscitation During the COVID-19 Pandemic: A View From Trainees on the Front Line. *Circulation*, *141*(23), 1833-1835. <https://doi.org/10.1161/circulationaha.120.047260>
- Desai, A. S., Kamdar, B. B., & Mehra, M. R. (2020). Special Article - Palliative care considerations for cardiovascular clinicians in COVID-19. *Prog Cardiovasc Dis*, *63*(5), 696-698. <https://doi.org/10.1016/j.pcad.2020.05.002>
- Ekairieb, R., Ahalt, C., Sudore, R., Metzger, L., & Williams, B. (2018). "We Take Care of Patients, but We Don't Advocate for Them": Advance Care Planning in Prison or Jail. *J Am Geriatr Soc*, *66*(12), 2382-2388. <https://doi.org/10.1111/jgs.15624>
- Essomba, M. J. N., Ciaffi, L., Etoundi, P. O., & Esiene, A. (2020). Palliative and end-of-life care in COVID-19 management in sub-Saharan Africa: a matter of concern. *Pan Afr Med J*, *35*(Suppl 2), 130. <https://doi.org/10.11604/pamj.suppl.2020.35.130.25288>
- Farrell, T. W., Ferrante, L. E., Brown, T., Francis, L., Widera, E., Rhodes, R., Rosen, T., Hwang U., Witt, L. J., Thothala, N., Liu, S. W., Vitale, C. A., Braun, U. K., Stephens, C., & Saliba, D. (2020). AGS Position Statement: Resource Allocation Strategies and Age-Related Considerations in the COVID-19 Era and Beyond. *J Am Geriatr Soc*, *68*(6), 1136-1142. <https://doi.org/10.1111/jgs.16537>
- Farrell, T. W., Francis, L., Brown, T., Ferrante, L. E., Widera, E., Rhodes, R., Rosen, T., Hwang U., Witt, L. J., Thothala, N., Liu, S. W., Vitale, C. A., Braun, U. K., Stephens, C., & Saliba, D. (2020). Rationing Limited Healthcare Resources in the COVID-19 Era and Beyond: Ethical Considerations Regarding Older Adults. *J Am Geriatr Soc*, *68*(6), 1143-1149. <https://doi.org/10.1111/jgs.16539>
- Fausto, J., Hirano, L., Lam, D., Mehta, A., Mills, B., Owens, D., Perry, E., & Curtis, J. R. (2020). Creating a Palliative Care Inpatient Response Plan for COVID-19-The UW Medicine Experience. *J Pain Symptom Manage*, *60*(1), e21-e26. <https://doi.org/10.1016/j.jpainsymman.2020.03.025>
- Funk, D. C., Moss, A. H., & Speis, A. (2020). How COVID-19 Changed Advance Care Planning: Insights From the West Virginia Center for End-of-Life Care [Observational Study]. *Journal of Pain & Symptom Management*, *60*(6), e5-e9. <https://doi.org/https://dx.doi.org/10.1016/j.jpainsymman.2020.09.021>
- Galbadage, T., Peterson, B. M., Wang, D. C., Wang, J. S., & Gunasekera, R. S. (2020). Biopsychosocial and Spiritual Implications of Patients With COVID-19 Dying in Isolation. *Front Psychol*, *11*, 588623. <https://doi.org/10.3389/fpsyg.2020.588623>
- Gaur, S., Pandya, N., Dumyati, G., Nace, D. A., Pandya, K., & Jump, R. L. P. (2020). A Structured Tool for Communication and Care Planning in the Era of the COVID-19 Pandemic. *J Am Med Dir Assoc*, *21*(7), 943-947. <https://doi.org/10.1016/j.jamda.2020.05.062>
- Gilissen, J., Pivodic, L., Unroe, K. T., & Van den Block, L. (2020). International COVID-19 Palliative Care Guidance for Nursing Homes Leaves Key Themes Unaddressed. *J Pain Symptom Manage*, *60*(2), e56-e69. <https://doi.org/10.1016/j.jpainsymman.2020.04.151>
- Gordon, A. L., Goodman, C., Achterberg, W., Barker, R. O., Burns, E., Hanratty, B., Martin, F. C., Meyer, J., O'Neill, D., Schols, J., & Spilbury, K. (2020). Commentary: COVID in care homes—challenges and dilemmas in healthcare delivery. *Age Ageing*, *49*(5), 701-705. <https://doi.org/10.1093/ageing/afaa113>
- Gupta, A., Bahl, B., Rabadi, S., Mebane, A., 3rd, Levey, R., & Vasudevan, V. (2021). Value of Advance Care Directives for Patients With Serious Illness in the Era of COVID Pandemic: A Review of



- Challenges and Solutions [Review]. *American Journal of Hospice & Palliative Medicine*, 38(2), 191-198. <https://doi.org/https://dx.doi.org/10.1177/1049909120963698>
- Gupta, S., Hayek, S. S., Wang, W., Chan, L., Mathews, K. S., Melamed, M. L., Brenner, S. K., Leonberg-Yoo, A., Schenck, E. J., Radbel, J., Reiser, J., Bansal, A., Srivastava, A., Zhou, Y., Sutherland, A., Green, A., Shehata, A. M., Goyal, N., Vijayan, A., . . . Investigators, S.-C. (2020). Factors Associated With Death in Critically Ill Patients With Coronavirus Disease 2019 in the US. *JAMA Internal Medicine*, 180(11), 1436-1447. <https://doi.org/10.1001/jamainternmed.2020.3596>
- Harrison, K. L., Adrion, E. R., Ritchie, C. S., Sudore, R. L., & Smith, A. K. (2016). Low Completion and Disparities in Advance Care Planning Activities Among Older Medicare Beneficiaries. *JAMA Intern Med*, 176(12), 1872-1875. <https://doi.org/10.1001/jamainternmed.2016.6751>
- Heyland, D. K. (2020). Advance Care Planning (ACP) vs. Advance Serious Illness Preparations and Planning (ASIPP). *Healthcare (Basel)*, 8(3). <https://doi.org/10.3390/healthcare8030218>
- Ho, E. P., & Neo, H.-Y. (2021). COVID 19: prioritise autonomy, beneficence and conversations before score-based triage. *Age Ageing*, 50(1), 11-15. <https://doi.org/10.1093/ageing/afaa205>
- Hopkins, S. A., Lovick, R., Polak, L., Bowers, B., Morgan, T., Kelly, M. P., & Barclay, S. (2020). Reassessing advance care planning in the light of covid-19. *BMJ*, 369, m1927-m1927. <https://doi.org/10.1136/bmj.m1927>
- Hughes, M., & Cartwright, C. (2015). Lesbian, gay, bisexual and transgender people's attitudes to end-of-life decision-making and advance care planning. *Australas J Ageing*, 34 Suppl 2, 39-43. <https://doi.org/10.1111/ajag.12268>
- Hughes, M. C., & Vernon, E. (2021). Hospice Response to COVID-19: Promoting Sustainable Inclusion Strategies for Racial and Ethnic Minorities. *J Gerontol Soc Work*, 64(2), 101-105. <https://doi.org/10.1080/01634372.2020.1830218>
- Iacobucci, G. (2020). Covid-19: Don't apply advance care plans to groups of people, doctors' leaders warn. *BMJ*, 369, m1419. <https://doi.org/10.1136/bmj.m1419>
- Janssen, D. J. A., Ekstroem, M., Currow, D. C., Johnson, M. J., Maddocks, M., Simonds, A. K., Tonia, T., & Marsaa, K. (2020). COVID-19: guidance on palliative care from a European Respiratory Society international task force. *Eur Respir J*, 56(3), 2002583. <https://doi.org/10.1183/13993003.02583-2020>
- Janwadkar, A. S., & Bibler, T. M. (2020). Ethical Challenges in Advance Care Planning During the COVID-19 Pandemic. *Am J Bioeth*, 20(7), 202-204. <https://doi.org/10.1080/15265161.2020.1779855>
- Kaplan, L. M., Sudore, R. L., Arellano Cuervo, I., Bainto, D., Olsen, P., & Kushel, M. (2020). Barriers and Solutions to Advance Care Planning among Homeless-Experienced Older Adults. *J Palliat Med*, 23(10), 1300-1306. <https://doi.org/10.1089/jpm.2019.0550>
- Kluger, B. M., Vaughan, C. L., Robinson, M. T., Creutzfeldt, C., Subramanian, I., & Holloway, R. G. (2020). Neuropalliative care essentials for the COVID-19 crisis. *Neurology*, 95(9), 394-398. <https://doi.org/10.1212/wnl.00000000000010211>
- Kotze, C., & Roos, J. L. (2020). End-of-life decision-making capacity in an elderly patient with schizophrenia and terminal cancer. *S Afr Fam Pract (2004)*, 62(1), e1-e4. <https://doi.org/10.4102/safp.v62i1.5111>
- Kuntz, J. G., Kavalieratos, D., Esper, G. J., Ogbu Jr, N., Mitchell, J., Ellis, C. M., & Quest, T. (2020). Feasibility and acceptability of inpatient palliative care E-family meetings during COVID-19 pandemic. *Journal of pain and symptom management*, 60(3), e28-e32.
- Kuzuya, M., Aita, K., Katayama, Y., Katsuya, T., Nishikawa, M., Hirahara, S., Miura, H., Yanagawa, M., Arai, H., Iijima, K., Okochi, J., Kozaki, K., Yamaguchi, Y., Rakugi, H., & Akishita, M. (2020). The Japan Geriatrics Society consensus statement "recommendations for older persons to receive the best medical and long-term care during the COVID-19 outbreak-considering the timing of advance care planning implementation" [Practice Guideline]. *Geriatrics & gerontology international*, 20(12), 1112-1119. <https://doi.org/https://dx.doi.org/10.1111/ggi.14075>
- Liao, C. T., Chang, W. T., Yu, W. L., & Toh, H. S. (2020). Management of acute cardiovascular events in patients with COVID-19. *Rev Cardiovasc Med*, 21(4), 577-581. <https://doi.org/10.31083/j.rcm.2020.04.140>

- Lin, C. T., Bookman, K., Sieja, A., Markley, K., Altman, R. L., Sippel, J., Perica, K., Reece, L., Davis, C., Horowitz, E., Pisney, L., Sottile, P. D., Kao, D., Adrian, B., Szkil, M., Griffin, J., Youngwerth, J., Drew, B., & Pell, J. (2020). Clinical informatics accelerates health system adaptation to the COVID-19 pandemic: examples from Colorado. *J Am Med Inform Assoc*, 27(12), 1955-1963. <https://doi.org/10.1093/jamia/ocaa171>
- Lin, M. H., Hsu, J. L., Chen, T. J., & Hwang, S. J. (2021). Impact of the COVID-19 pandemic on the use of advance care planning services within the veterans administration system in Taiwan. *Journal of the Chinese Medical Association: JCMA*, 84(2), 197-202. <https://doi.org/https://dx.doi.org/10.1097/JCMA.0000000000000459>
- McAfee, C. A., Jordan, T. R., Cegelka, D., Polavarapu, M., Wotring, A., Wagner-Greene, V. R., & Hamdan, Z. (2020). COVID-19 brings a new urgency for advance care planning: Implications of death education. *Death Stud*, 1-6. <https://doi.org/10.1080/07481187.2020.1821262>
- McMahan, R. D., Tellez, I., & Sudore, R. L. (2021). Deconstructing the Complexities of Advance Care Planning Outcomes: What Do We Know and Where Do We Go? A Scoping Review. *J Am Geriatr Soc*, 69(1), 234-244. <https://doi.org/10.1111/jgs.16801>
- Mills, S., Cioletti, A., Gingell, G., & Ramani, S. (2021). Training residents in virtual advance care planning: A new twist in telehealth. *J Pain Symptom Manage*. <https://doi.org/10.1016/j.jpainsymman.2021.03.019>
- Moore, K. J., Sampson, E. L., Kupeli, N., & Davies, N. (2020). Supporting families in end-of-life care and bereavement in the COVID-19 era. *International Psychogeriatrics*, 32(10), 1245-1248. <https://doi.org/10.1017/S1041610220000745>
- Moorman, S., Boerner, K., & Carr, D. (2020). Rethinking the Role of Advance Care Planning in the Context of Infectious Disease. *Journal of Aging & Social Policy*, 1-7. <https://doi.org/10.1080/08959420.2020.1824540>
- Morrow-Howell, N., Galucia, N., & Swinford, E. (2020). Recovering from the COVID-19 Pandemic: A Focus on Older Adults. *Journal of Aging & Social Policy*, 32(4-5), 526-535. <https://doi.org/https://dx.doi.org/10.1080/08959420.2020.1759758>
- Nguyen, A. L., Davtyan, M., Taylor, J., Christensen, C., & Brown, B. (2021). Perceptions of the Importance of Advance Care Planning During the COVID-19 Pandemic Among Older Adults Living With HIV. *Front Public Health*, 9, 636786. <https://doi.org/10.3389/fpubh.2021.636786>
- Onder, G., Rezza, G., & Brusaferro, S. (2020). Case-Fatality Rate and Characteristics of Patients Dying in Relation to COVID-19 in Italy. *JAMA*, 323(18), 1775-1776. <https://doi.org/10.1001/jama.2020.4683>
- Osterman, C. K., Triglianios, T., Winzelberg, G. S., Nichols, A. D., Rodriguez-O'Donnell, J., Bigelow, S. M., van Deventer, H., Sanoff, H. K., & Ray, E. M. (2021). Risk stratification and outreach to hematology/oncology patients during the COVID-19 pandemic. *Support Care Cancer*, 29(3), 1161-1164. <https://doi.org/10.1007/s00520-020-05744-y>
- Paladino, J., Mitchell, S., Mohta, N., Lakin, J. R., Downey, N., Fromme, E. K., Gullo, S., Benjamin, E., & Sanders, J. J. (2021). Communication Tools to Support Advance Care Planning and Hospital Care During the COVID-19 Pandemic: A Design Process [Research Support, Non-U.S. Gov't]. *Joint Commission Journal on Quality & Patient Safety*, 47(2), 127-136. <https://doi.org/https://dx.doi.org/10.1016/j.jcjq.2020.10.005>
- Piscitello, G. M., Fukushima, C. M., Saulitis, A. K., Tian, K. T., Hwang, J., Gupta, S., & Sheldon, M. (2021). Family Meetings in the Intensive Care Unit During the Coronavirus Disease 2019 Pandemic. *American Journal of Hospice & Palliative Medicine*, 38(3), 305-312. <https://doi.org/https://dx.doi.org/10.1177/1049909120973431>
- Portz, J. D., Brungardt, A., Shanbhag, P., Staton, E. W., Bose-Brill, S., Lin, C. T., Kutner, J. S., & Lum, H. D. (2020). Advance Care Planning Among Users of a Patient Portal During the COVID-19 Pandemic: Retrospective Observational Study [Observational Study  
Research Support, N.I.H., Extramural]. *Journal of Medical Internet Research*, 22(8), e21385. <https://doi.org/https://dx.doi.org/10.2196/21385>
- Powell, V. D., & Silveira, M. J. (2021). Palliative Care for Older Adults with Multimorbidity in the Time of COVID 19. *Journal of Aging & Social Policy*, 1-9. <https://doi.org/10.1080/08959420.2020.1851436>



- Prost, S. G., Novisky, M. A., Rorvig, L., Zaller, N., & Williams, B. (2021). Prisons and COVID-19: A Desperate Call for Gerontological Expertise in Correctional Health Care. *Gerontologist*, 61(1), 3-7. <https://doi.org/10.1093/geront/gnaa088>
- Rabow, M. W., Keyssar, J. R., Long, J., Aoki, M., & Kojimoto, G. (2021). Palliative Care Education During COVID-19: The MERI Center for Education in Palliative Care at UCSF/Mt. Zion. *American Journal of Hospice & Palliative Medicine*, 10499091211000285. <https://doi.org/10.1177/10499091211000285>
- Raftery, C., Lewis, E., & Cardona, M. (2020). The Crucial Role of Nurses and Social Workers in Initiating End-of-Life Communication to Reduce Overtreatment in the Midst of the COVID-19 Pandemic. *Gerontology*, 66(5), 427-430. <https://doi.org/10.1159/000509103>
- Rao, J. K., Anderson, L. A., Lin, F. C., & Laux, J. P. (2014). Completion of advance directives among U.S. consumers. *Am J Prev Med*, 46(1), 65-70. <https://doi.org/10.1016/j.amepre.2013.09.008>
- Reja, M., Naik, J., & Parikh, P. (2020). COVID-19: Implications for Advanced Care Planning and End-of-life Care. *West J Emerg Med*, 21(5), 1046-1047. <https://doi.org/10.5811/westjem.2020.6.48049>
- Rivet, E. B., Blades, C. E., Hutson, M., & Noreika, D. (2020). Chronic and Sudden Serious Illness, COVID-19, and Decision-Making Capacity: Integrating Advance Care Planning Into the Preoperative Checklist for Elective Surgery. *Am Surg*, 86(11), 1450-1455. <https://doi.org/10.1177/0003134820965957>
- Roberts, B., Wright, S. M., Christmas, C., Robertson, M., & Wu, D. S. (2020). COVID-19 Pandemic Response: Development of Outpatient Palliative Care Toolkit Based on Narrative Communication. *American Journal of Hospice & Palliative Medicine*, 37(11), 985-987. <https://doi.org/https://dx.doi.org/10.1177/1049909120944868>
- Rosenberg, A. R., Popp, B., Dizon, D. S., El-Jawahri, A., & Spence, R. (2020). Now, More Than Ever, Is the Time for Early and Frequent Advance Care Planning [Research Support, N.I.H., Extramural Research Support, Non-U.S. Gov't]. *Journal of Clinical Oncology*, 38(26), 2956-2959. <https://doi.org/https://dx.doi.org/10.1200/JCO.20.01080>
- Salins, N., Mani, R. K., Gursahani, R., Simha, S., & Bhatnagar, S. (2020). Symptom Management and Supportive Care of Serious COVID-19 Patients and their Families in India. *Indian J Crit Care Med*, 24(6), 435-444. <https://doi.org/10.5005/jp-journals-10071-23400>
- Selman L, Lapwood S, Jones N, Pocock L, Anderson R, Pilbeam C, B, J., Chao D, Roberts N, Short T, & Ondruskova T. (2020). *Advance care planning in the community in the context of COVID-19*. Retrieved 20/03/2021 from <https://www.cebm.net/covid-19/advance-care-planning-in-the-community-in-the-context-of-covid-19/>
- Selman, L. E., Chao, D., Sowden, R., Marshall, S., Chamberlain, C., & Koffman, J. (2020). Bereavement Support on the Frontline of COVID-19: Recommendations for Hospital Clinicians. *Journal of Pain & Symptom Management*, 60(2), e81-e86. <https://doi.org/https://dx.doi.org/10.1016/j.jpainsymman.2020.04.024>
- Sinclair, C., Nolte, L., White, B. P., & Detering, K. (2020). Advance care planning in Australia during the COVID-19 outbreak: now more important than ever. *Intern Med J*, 50(8), 918-923. <https://doi.org/10.1111/imj.14937>
- Singh, A. G., Deodhar, J., & Chaturvedi, P. (2020). Navigating the impact of COVID-19 on palliative care for head and neck cancer. *Head Neck*, 42(6), 1144-1146. <https://doi.org/10.1002/hed.26211>
- Singh, S., Herrmann, K., Cyriacks, W., Youngwerth, J., Bickel, K. E., & Lum, H. D. (2021). Increasing Medical Power of Attorney Completion for Hospitalized Patients During the COVID Pandemic: A Social Work Led Quality Improvement Intervention. *J Pain Symptom Manage*, 61(3), 579-584.e571. <https://doi.org/10.1016/j.jpainsymman.2020.10.033>
- Smith, G. M., Hui, F. A., Bleymaier, C. R., Bragg, A. R., & Harman, S. M. (2020). What If I Get Seriously Ill? A Virtual Workshop for Advance Care Planning During COVID-19. *Journal of Pain & Symptom Management*, 60(5), e21-e24. <https://doi.org/https://dx.doi.org/10.1016/j.jpainsymman.2020.08.022>

- Sudore, R. L., Lum, H. D., You, J. J., Hanson, L. C., Meier, D. E., Pantilat, S. Z., Matlock, D. D., Rietjens, J. A. C., Korfage, I. J., Ritchie, C. S., Kutner, J. S., Teno, J. M., Thomas, J., McMahan, R. D., & Heyland, D. K. (2017). Defining Advance Care Planning for Adults: A Consensus Definition From a Multidisciplinary Delphi Panel. *J Pain Symptom Manage*, 53(5), 821-832.e821. <https://doi.org/10.1016/j.jpainsymman.2016.12.331>
- US Centers for Disease Control and Prevention. (2019). *Coronavirus Disease 2019 (COVID-19): People Who Are at Higher Risk for Severe Illness*. Retrieved 11 July from <https://www.cdc.gov/coronavirus/2019-ncov/need-extra-precautions/people-at-higher-risk.html>
- Valeri, A. M., Robbins-Juarez, S. Y., Stevens, J. S., Ahn, W., Rao, M. K., Radhakrishnan, J., Gharavi, A. G., Mohan, S., & Husain, S. A. (2020). Presentation and Outcomes of Patients with ESKD and COVID-19. *J Am Soc Nephrol*, 31(7), 1409-1415. <https://doi.org/10.1681/asn.2020040470>
- Vergano, M., Bertolini, G., Giannini, A., Gristina, G. R., Livigni, S., Mistraletti, G., Riccioni, L., & Petrini, F. (2020). Clinical ethics recommendations for the allocation of intensive care treatments in exceptional, resource-limited circumstances: the Italian perspective during the COVID-19 epidemic. *Critical Care*, 24(1), 165. <https://doi.org/10.1186/s13054-020-02891-w>
- Vipperman, A., Zimmerman, S., & Sloane, P. D. (2021). COVID-19 Recommendations for Assisted Living: Implications for the Future. *J Am Med Dir Assoc*. <https://doi.org/10.1016/j.jamda.2021.02.021>
- Wallace, C. L., Wladkowski, S. P., Gibson, A., & White, P. (2020). Grief During the COVID-19 Pandemic: Considerations for Palliative Care Providers. *J Pain Symptom Manage*, 60(1), e70-e76. <https://doi.org/10.1016/j.jpainsymman.2020.04.012>
- West, E., Moore, K., Kupeli, N., Sampson, E. L., Nair, P., Aker, N., & Davies, N. (2021). Rapid review of decision-making for place of care and death in older people: lessons for COVID-19. *Age Ageing*, 50(2), 294-306. <https://doi.org/10.1093/ageing/afaa289>
- White, B., Tilse, C., Wilson, J., Rosenman, L., Strub, T., Feeney, R., & Silvester, W. (2014). Prevalence and predictors of advance directives in Australia. *Intern Med J*, 44(10), 975-980. <https://doi.org/10.1111/imj.12549>
- World Health Organization Alliance for Health Policy and Systems Research. (2017). *Rapid reviews to strengthen health policy and systems: a practical guide*. <https://www.who.int/alliance-hpsr/resources/publications/rapid-review-guide/en/>
- Xu, Y., Zhang, L. K., Smeltz, R. L., & Cohen, S. E. (2021). A Vital Layer of Support: One Safety Net Hospital's Palliative Care Response to the Pandemic. *J Palliat Med*. <https://doi.org/10.1089/jpm.2020.0571>
- Yadav, K. N., Gabler, N. B., Cooney, E., Kent, S., Kim, J., Herbst, N., Mante, A., Halpern, S. D., & Courtright, K. R. (2017). Approximately One In Three US Adults Completes Any Type Of Advance Directive For End-Of-Life Care. *Health Aff (Millwood)*, 36(7), 1244-1251. <https://doi.org/10.1377/hlthaff.2017.0175>
- Ye, P., Fry, L., & Champion, J. D. (2021). Changes in Advance Care Planning for Nursing Home Residents During the COVID-19 Pandemic. *Journal of the American Medical Directors Association*, 22(1), 209-214. <https://doi.org/https://dx.doi.org/10.1016/j.jamda.2020.11.011>

**Supplement 1. Summary of Publications and Resources for Cohort Studies, Consensus Guidelines, Narrative Reviews, Cross-Sectional, Case Reports & Commentaries**

**COHORT STUDIES**

| <b>Authors, Year, Journal</b>                                                  | <b>Study design: Cohorts /country</b> | <b>Population and setting</b>                                                                                                                                                 | <b>Objectives</b>                                                                                                                                                                                                          | <b>Resources (when available)</b>                                                                                                                                                                                                                                                                                         | <b>Main findings &amp; comments</b>                                                                                                                                                                                                                                                                                                                                                                                                                                                                                                                                                                                                                                                                                                |
|--------------------------------------------------------------------------------|---------------------------------------|-------------------------------------------------------------------------------------------------------------------------------------------------------------------------------|----------------------------------------------------------------------------------------------------------------------------------------------------------------------------------------------------------------------------|---------------------------------------------------------------------------------------------------------------------------------------------------------------------------------------------------------------------------------------------------------------------------------------------------------------------------|------------------------------------------------------------------------------------------------------------------------------------------------------------------------------------------------------------------------------------------------------------------------------------------------------------------------------------------------------------------------------------------------------------------------------------------------------------------------------------------------------------------------------------------------------------------------------------------------------------------------------------------------------------------------------------------------------------------------------------|
| Auriemma CL, Halpern SD, Asch JM, Van Der Tuyn M, Asch DA 2020<br>JAMA network | Cohort study - prospective<br><br>USA | Users of ourcarewishes.org - a free online tool to guide ACP                                                                                                                  | To quantify changes to patient completion of advance directives and expressed preferences during COVID-19 pandemic by monitoring users of a web-based advance care planning (ACP) platform from January 2019 to April 2020 | Users of ourcarewishes.org - a free online tool to guide ACP<br><br>OurCareWishes.org<br><a href="https://www.ourcarewishes.org/">https://www.ourcarewishes.org/</a>                                                                                                                                                      | During the pre-COVID period there were 424 users, with a median (IQR) of 26 (22-30) monthly new users, 5 (3-6) monthly returning users, and 31 (28-34) monthly total users. During the COVID-19 period, there were a median (IQRs) of 133 (71-207) monthly new users, 21 (11-39) monthly returning users, and 154 (82-246) monthly total users. This represents a 4.9-fold increase in monthly users in the COVID-19 period compared with the pre-COVID-19 period.<br>The reasons for increased demand for ACP documentation could be explained by a sense of increased importance of ACP during COVID-19, the push for clinicians to promote ACP or new motivation for people wanting to complete ACP but who have never done so. |
| Back AL, Grant MS, McCabe PJ 2021<br>J Palliat Med                             | Cohort study – prospective<br><br>USA | Two focus groups conducted before and during COVID-19 pandemic                                                                                                                | To use focus groups to understand public perceptions of serious illness care that can be used to design for greater public engagement                                                                                      | Two focus groups conducted before and during COVID-19 pandemic                                                                                                                                                                                                                                                            | 82 people from the general population participated. They were aged 50-80 years, 50% male, 30% from diverse backgrounds. There were three main observations;<br>1. Misunderstanding about ACP, palliative care and hospice care is widespread.<br>2. COVID-19 evokes its own brand of confusion and ambivalence - all were reluctant to go to hospital if they had COVID-19 due to not wanting to die alone<br>3. Distrust of the health care system is the new normal.                                                                                                                                                                                                                                                             |
| Berning MJ, Palmer E, Tsai T, et al 2021<br>J Am Geriatr Soc                   | Cohort study – prospective<br><br>USA | Residents at 2 nursing homes in Boston, USA with activated healthcare proxies who lacked DNH directives as of April 13, 2020. Trained HCW contacted proxies to conduct COVID- | To describe a systematic approach to address ACP during a COVID-19 outbreak and its impact on the incidence of new Do-Not-Hospitalise (DNH) directives among nursing home residents.                                       | Supplementary discussion guide<br><a href="https://agsjournals.onlinelibrary.wiley.com/action/downloadSupplement?doi=10.1111%2Fjgs.17051&amp;file=jgs17051-sup-0001-supinfo.pdf">https://agsjournals.onlinelibrary.wiley.com/action/downloadSupplement?doi=10.1111%2Fjgs.17051&amp;file=jgs17051-sup-0001-supinfo.pdf</a> | At baseline, 315/518 (54%) residents did not have DNH directives - 70% were female, mean age 87 (+/-9) years, 33% had moderate-severe cognitive impairment, 24% had a Do-not-resuscitate directive. Following the intervention, 124 (39%) of the 315 residents acquired new DNH directives - 52% went on to be diagnosed with COVID-19 and 23% died during follow-up. Among all residents that ended up with DNH directives, only 3 (2%) were hospitalised.<br>Enablers to implement this ACP initiative included a robust electronic Medical Record (eMR), multi-disciplinary team structure and strong stakeholder involvement.                                                                                                  |

| Authors, Year, Journal                                                                   | Study design: Cohorts /country        | Population and setting                                                                                                                              | Objectives                                                                                                                                                                                                 | Resources (when available)                                                                                                                                                                                                                                                 | Main findings & comments                                                                                                                                                                                                                                                                                                                                                                                                                                                                                                                                                                                                                                                                                                                                                                                                                                                                                                                                                                                                                                                                                                                                                                                            |
|------------------------------------------------------------------------------------------|---------------------------------------|-----------------------------------------------------------------------------------------------------------------------------------------------------|------------------------------------------------------------------------------------------------------------------------------------------------------------------------------------------------------------|----------------------------------------------------------------------------------------------------------------------------------------------------------------------------------------------------------------------------------------------------------------------------|---------------------------------------------------------------------------------------------------------------------------------------------------------------------------------------------------------------------------------------------------------------------------------------------------------------------------------------------------------------------------------------------------------------------------------------------------------------------------------------------------------------------------------------------------------------------------------------------------------------------------------------------------------------------------------------------------------------------------------------------------------------------------------------------------------------------------------------------------------------------------------------------------------------------------------------------------------------------------------------------------------------------------------------------------------------------------------------------------------------------------------------------------------------------------------------------------------------------|
|                                                                                          |                                       | 19 focused ACP discussions                                                                                                                          |                                                                                                                                                                                                            |                                                                                                                                                                                                                                                                            |                                                                                                                                                                                                                                                                                                                                                                                                                                                                                                                                                                                                                                                                                                                                                                                                                                                                                                                                                                                                                                                                                                                                                                                                                     |
| Kuntz JG, Kavalieratos D, Esper GJ, et al 2020<br>Journal of pain and symptom management | Cohort study – prospective<br><br>USA | The inpatient team at Emory Palliative Care Centre, Georgia USA, conducted family meetings via Zoom.                                                | To implement and evaluate the use of telemedicine on the family meeting                                                                                                                                    | E-family meeting procedure guide to use on Zoom provided                                                                                                                                                                                                                   | 67 e-family meetings were conducted for 63 patients, 70% of whom were COVID-19 positive and 59% of whom were intubated. The main reasons for family meetings were to provide support (90%), provide clinical information (38%) and clarify goals of care (35%). The average clinician rating of e-family meetings was 3.18/5 (SD 0.96). There was a high degree of satisfaction among clinicians and families using e-family meetings.                                                                                                                                                                                                                                                                                                                                                                                                                                                                                                                                                                                                                                                                                                                                                                              |
| Osterman CK, Triglianos T, Winzelberg GS, et al 2021<br>Support Care Cancer              | Cohort study – prospective<br><br>USA | Haematology and Oncology patients in North Carolina, USA                                                                                            | To risk-stratify oncology patients to identify those at high risk for acute healthcare utilization during COVID-19 pandemic and pilot implementation of a telephone-based outreach for high-risk patients. | Patient outreach documentation template of standardized questions and recommended interventions for identified patient need<br><br><a href="https://link.springer.com/article/10.1007/s00520-020-05744-y">https://link.springer.com/article/10.1007/s00520-020-05744-y</a> | 1697 patients were risk-stratified. A Health Composite Score (HCS) is predictive of 90-day hospitalisation. The Cancer-specific risk (CRS) was also calculated. Both were used for risk stratification to assess likelihood of acute healthcare utilisation. By HCS and CSR, 17% and 22% of patients were high risk respectively.<br>The outreach telehealth program focused on questions and interventions around symptoms, medications, coping, resources, ACP, and cancer care. In the first month 286 patients were called and 245 (86%) were successfully contacted. Commonly identified patient issues were financial difficulties (17%), uncontrolled symptoms (15%), and interest in ACP (13%). Overall, 33% of patients were referred for additional services.<br>The pandemic has forced rapid changes to healthcare delivery, including increased utilization of telemedicine, which may introduce new barriers to care and new challenges to systematically addressing patient concerns, in turn increasing the risk for acute healthcare utilization. This telehealth intervention identified a high burden of unmet medical and psychosocial needs in oncology patients during the COVID-19 pandemic. |
| Mills S, Cioletti A, Gingell G, et al 2021<br>J Pain Symptom Manage                      | Cohort study – prospective<br><br>USA | 48 residents across a health centre and outpatient clinic in Texas, USA. During April and May 2020, a new mandatory ACP curriculum was implemented. | To create a virtual ACP curriculum to improve residents' confidence and communication skills around ACP in the outpatient setting.                                                                         | Supplementary question guide for patients at<br><a href="https://www.jpmsjournal.com/article/S0885-3924(21)00273-6/fulltext#relatedArticles">https://www.jpmsjournal.com/article/S0885-3924(21)00273-6/fulltext#relatedArticles</a>                                        | The COVID-19 pandemic highlights the urgency of teaching ACP to residents. The new ACP curriculum included pre-readings, virtual training and peer role-play. Residents then engaged 5 patients in ACP phone conversations, followed by virtual group debrief. Residents' confidence in conducting ACP conversations before and after the intervention showed no significant change except for discussing advance directives, where residents' confidence decreased significantly post training. This seems paradoxical but is consistent with the Kruger Dunning effect which suggests that increasing skill enhances awareness of previous lack of competence.<br>Four major themes were identified from qualitative data;                                                                                                                                                                                                                                                                                                                                                                                                                                                                                        |

| Authors, Year, Journal                                                                           | Study design: Cohorts /country      | Population and setting                                                                                                                                                          | Objectives                                                                                                                                                                | Resources (when available)                                                                                                                                                                                                               | Main findings & comments                                                                                                                                                                                                                                                                                                                                                                                                                                                                                                                                                                                                                                                                   |
|--------------------------------------------------------------------------------------------------|-------------------------------------|---------------------------------------------------------------------------------------------------------------------------------------------------------------------------------|---------------------------------------------------------------------------------------------------------------------------------------------------------------------------|------------------------------------------------------------------------------------------------------------------------------------------------------------------------------------------------------------------------------------------|--------------------------------------------------------------------------------------------------------------------------------------------------------------------------------------------------------------------------------------------------------------------------------------------------------------------------------------------------------------------------------------------------------------------------------------------------------------------------------------------------------------------------------------------------------------------------------------------------------------------------------------------------------------------------------------------|
|                                                                                                  |                                     |                                                                                                                                                                                 |                                                                                                                                                                           |                                                                                                                                                                                                                                          | <p>(1) Contrasting outpatient and inpatient settings - inpatient ACP is urgent, immediate and late whereas outpatient ACP provides more time and longitudinal relationships, however residents are less familiar with the outpatient setting.</p> <p>(2) ACP conversations provoke anxiety in residents.</p> <p>(3) The benefits and challenges of telehealth - patients are more relaxed in the comfort of their home and more willing to have these discussions, however language barriers and the inability to read facial and physical cues are barriers to ACP via telehealth.</p> <p>(4) Positive learner experience - residents gained valuable experience through the program.</p> |
| Smith GM, Hui FA, Bleymaier CR, Bragg AR, Harman SM 2020<br>Journal of Pain & Symptom Management | Cohort study – prospective<br>USA   | Two-part virtual ACP workshop developed at Stanford Health Care, California                                                                                                     | To describe the implementation and evaluation of a novel, public-facing, two-part virtual ACP workshop                                                                    | Stanford Palliative Care<br><a href="https://med.stanford.edu/palliative-care/COVID19.html">https://med.stanford.edu/palliative-care/COVID19.html</a><br><br>Two-part virtual ACP workshop developed at Stanford Health Care, California | 570 accounts registered for Part 1 workshop and 413 accounts logged in to participate. 91 accounts then participated in Part 2. 98 and 39 participants completed the post-session survey after Part 1 and Part 2 respectively. On a five-point Likert scale, the mean likelihood to recommend score for Part 1 was 4.0 (SD 1.4) and 4.2 (SD 1.4) for Part 2. The mean overall ACP engagement score after Part 1 was 4.0 (SD 0.8) and 3.8 (SD 0.7) after Part 2. The online workshop was a successful way to engage the public in ACP.                                                                                                                                                      |
| Singh S, Herrmann K, Cyriacks W, et al 2021<br>J Pain Symptom Manage                             | Cohort study – prospective<br>USA   | A large tertiary referral hospital in Denver, Colorado, USA. Between April and June 2020, all hospitalised patients were screened for a documented MDPOA in the last 12 months. | To assess the impact of a social work and care management intervention on the proportion of admitted patients each week with a Medical Durable Power of Attorney (MDPOA). |                                                                                                                                                                                                                                          | All hospitalised patients were screened for a documented MDPOA in the last 12 months and those without MDPOA in eMR were referred for the social work intervention. Prior to the intervention, on average 30.1% of patients had MDPOA forms documented in eMR. Post-intervention, the rate of MDPOA completion was 42.8% on average. The number of social work referrals overwhelmed the capacity of the department and resulted in the need to target high-risk patients only (including those with COVID, the elderly, oncology and trauma patients).                                                                                                                                    |
| Ye P, Fry L, Champion JD 2021<br>Journal of the American Medical Directors Association           | Cohort study – retrospective<br>USA | Nursing home residents or their surrogate decision makers in 15 nursing homes in Southwestern USA.                                                                              | To describe the care preference changes among nursing home residents receiving proactive ACP conversations from health care practitioners during COVID-19 pandemic        |                                                                                                                                                                                                                                          | 963 residents were included in the study. Most residents were women (62.1%) and age ranged from 22 to 105 years (mean = 78 years). At least one ACP conversation was had between the resident and health care worker between April and May 2020. Nursing home residents and their surrogates do change their care preferences significantly after ACP conversations.<br>Residents' chosen code status BEFORE Vs AFTER ACP conversation:<br>- full code: 37.5% vs 28.3%                                                                                                                                                                                                                     |

| Authors, Year, Journal                                                    | Study design: Cohorts /country          | Population and setting                                                                                                              | Objectives                                                                                                                                                                                                                                                              | Resources (when available)                                                                                                                                                                                                                                             | Main findings & comments                                                                                                                                                                                                                                                                                                                                                                                                                                                                                                                                                                                                                                                                                                                                                                                                                                                                                                                                                   |
|---------------------------------------------------------------------------|-----------------------------------------|-------------------------------------------------------------------------------------------------------------------------------------|-------------------------------------------------------------------------------------------------------------------------------------------------------------------------------------------------------------------------------------------------------------------------|------------------------------------------------------------------------------------------------------------------------------------------------------------------------------------------------------------------------------------------------------------------------|----------------------------------------------------------------------------------------------------------------------------------------------------------------------------------------------------------------------------------------------------------------------------------------------------------------------------------------------------------------------------------------------------------------------------------------------------------------------------------------------------------------------------------------------------------------------------------------------------------------------------------------------------------------------------------------------------------------------------------------------------------------------------------------------------------------------------------------------------------------------------------------------------------------------------------------------------------------------------|
|                                                                           |                                         |                                                                                                                                     |                                                                                                                                                                                                                                                                         |                                                                                                                                                                                                                                                                        | - Out of Hospital Do Not Resuscitate: 62.5% vs 71.7%<br>- Do not hospitalise 19.5% vs 47.2%<br>This study demonstrated that nursing home residents and their surrogates do change their care preferences significantly during the current COVID-19 pandemic.                                                                                                                                                                                                                                                                                                                                                                                                                                                                                                                                                                                                                                                                                                               |
| Burke RV, Rome R, Constanza K, et al<br>2020<br>Palliat Med Rep           | Cohort study – retrospective<br><br>USA | COVID-19 patients admitted to ICU in a hospital in New Orleans, USA, between March 29 and May 1 2020.                               | To pilot a team-based structured protocol to categorize severity of COVID-19 ICU admissions and collaborate with the palliative care team to assess physical, spiritual, and psychosocial needs                                                                         | Provides text for Palliative Care Social Work Phone Contact prompts                                                                                                                                                                                                    | All (n=19) COVID patients in ICU received a palliative care consult. 74% of consults resulted in completion of an advanced care directive. 58% of consults were completed using video. 100% of goals-of-care conversations occurred in person. The team-based approach decreased the facility burden of caring for seriously ill COVID-19 patients                                                                                                                                                                                                                                                                                                                                                                                                                                                                                                                                                                                                                         |
| Coleman JJ, Botkai A, Marson EJ, et al<br>2020<br>Resuscitation           | Cohort study – retrospective<br><br>UK  | A large urban teaching hospital in UK. Data extracted from eMR for DNACPR forms completed between 1 January 2017 and 30 April 2020. | To analyse eMR documentation on treatment limitation and Do-Not-Attempt-Cardiopulmonary-Resuscitation (DNACPR) decisions comparing uptake, decisions and answers to different sections of the form before and during the COVID-19 situation                             | Resuscitation Council<br><a href="https://www.resus.org.uk/covid-19-resources">https://www.resus.org.uk/covid-19-resources</a>                                                                                                                                         | Forms completed prior to 1 March 2020 were considered "pre-COVID". Forms completed between 1 March and 30 April 2020 were considered "during COVID". 16,007 forms were identified during the study period, including 1844 forms (11.5%) during COVID. Patients completing DNACPR forms during COVID were younger, less likely to have co-morbidities and less likely to have a referral to the palliative care team. During COVID, significantly more patients had documents stating CPR would be appropriate (23.8% vs 9.05%, p<0.001) and for full active treatment (30.5% vs 26.1%, p=0.028). There was a significant decrease in DNACPR decisions being discussed with relatives - dropping from 75.4% to 50.6% (p < 0.001), likely due to visitor restrictions.<br>This data suggests that there was a shift during the COVID-19 pandemic from undertaking ACP conversations and DNACPR decision only in critically ill patients to a much wider group of inpatients. |
| Funk DC, Moss AH, Speis A<br>2020<br>Journal of Pain & Symptom Management | Cohort study - retrospective<br><br>USA | The West Virginia Centre for End of Life Care, USA                                                                                  | To describe the impact COVID-19 had on ACP based on changes in the calls to the West Virginia Center for End-of-Life Care and in the volume and types of documents requested from and submitted to the center and its e-Directive Registry between January to June 2020 | Center to Advance Palliative Care. "Fast five:" Legal issues in advance care planning during COVID-19. CAPC.org<br><a href="https://www.capc.org/covid-19/communication/advance-care-planning/">https://www.capc.org/covid-19/communication/advance-care-planning/</a> | Calls to the centre during this six month period related to four main topics;<br>1. Confirmation of documents in the registry<br>2. Urgent desire to initiate advance care planning<br>3. Request for temporary rescindment of treatment-limiting forms<br>4. Patient-specific questions about how to honour patients' wishes in advance directives and medical orders in light of their COVID-19 status.<br>The number of advance directive forms distributed in this time period was the highest in the last five years. There was a 77.18% increase in Do-Not-Resuscitate cards received in the first six months of 2020.                                                                                                                                                                                                                                                                                                                                               |



| Authors, Year, Journal                                                                                    | Study design: Cohorts /country             | Population and setting                                                                                                                                                              | Objectives                                                                                                    | Resources (when available)                                  | Main findings & comments                                                                                                                                                                                                                                                                                                                                                                                                                                                                                                                                                                                                                                                                                                                                                                                                                                                                                                                                                                                                                                                                                                                                                                                                                                                                                                 |
|-----------------------------------------------------------------------------------------------------------|--------------------------------------------|-------------------------------------------------------------------------------------------------------------------------------------------------------------------------------------|---------------------------------------------------------------------------------------------------------------|-------------------------------------------------------------|--------------------------------------------------------------------------------------------------------------------------------------------------------------------------------------------------------------------------------------------------------------------------------------------------------------------------------------------------------------------------------------------------------------------------------------------------------------------------------------------------------------------------------------------------------------------------------------------------------------------------------------------------------------------------------------------------------------------------------------------------------------------------------------------------------------------------------------------------------------------------------------------------------------------------------------------------------------------------------------------------------------------------------------------------------------------------------------------------------------------------------------------------------------------------------------------------------------------------------------------------------------------------------------------------------------------------|
| Lin MH, Hsu JL, Chen TJ, Hwang SJ 2021<br>J Chin Med Assoc                                                | Cohort study – retrospective<br><br>Taiwan | 15 veterans' hospitals in Taiwan providing outpatient ACP services from 2019 to June 2020.                                                                                          | To investigate the effect of COVID-19 on the outpatient ACP services provided by veterans hospitals in Taiwan |                                                             | 2493 individuals received ACP services between April 2019 and June 2020. ACP services declined from 206.2 ± 29.2 declarants per month (before COVID-19) to 106.2 ± 30.8 declarants per month (during COVID-19). During the pandemic, those who received ACP services were younger, more likely to be health-care workers, and more likely to pay for the ACP services. Overall, there was significantly less ACP completed during COVID-19 period. This was likely due to the public complying with government restrictions, staying home and cancelling non-necessary outpatient appointments to reduce risk of transmission.<br>Obstacles hindering people from seeking, receiving, or offering ACP services included;<br>- the general public's lack of knowledge and understanding pertaining to ACP<br>- hospitals lacking the mechanisms needed to provide ACP services<br>- shortages in private space in wards or outpatient environments<br>- difficulty finding two witnesses to complete the document-signing process<br>- medical staff did not possess sufficient ACP knowledge and avoided talking about death-related matters, were subjected to the clinical pressure of not having enough time, and were sceptical whether the legal effects of the ACP would affect declarants' willingness to engage. |
| Piscitello GM, Fukushima CM, Saulitis AK, Tian KT, Hwang J, Gupta S, et al 2021<br>Am J Hosp Palliat Care | Cohort study – retrospective<br><br>USA    | Patients admitted to ICU at an urban academic hospital in Southwest USA between March to June 2020, who lacked decision-making capacity and received a referral for a video meeting | To evaluate the quantity of family meetings by telephone, video and in-person during COVID-19 pandemic        |                                                             | 61 patients met the study's inclusion criteria and 93% had these had COVID-19. 61% patients died during the hospital admission. 7% of patients had a documented Power of Attorney. In total, 650 family meetings were documented for these 61 patients. Only 36% of these family meetings discussed patient goals of care. Most family meetings occurred by phone (59%), whereas 8% were conducted by video, 11% were conducted in-person and 22% unknown. The majority of in-person meetings (57%) discussed goals of care and a change in goals of care was more likely to occur for in-person meetings because families can better understand patient's condition when at the bedside. On average, patients had a documented family meeting every 2 days during their admission which is less than other studies (pre-COVID) which showed family meetings every 1.2 days per patient in ICU. Barriers to video conferencing including access, elderly family members and cost.                                                                                                                                                                                                                                                                                                                                        |
| Portz JD, Brungardt A,                                                                                    | Cohort study -                             | Web-based ACP tool available                                                                                                                                                        | To determine the rates of use of a web-based ACP tool through an                                              | Advance Care Planning. National Hospice and Palliative Care | Over the 5-month timeframe, the number of user clicks on the UCHealth ACP patient portal page increased from 3511 in January to                                                                                                                                                                                                                                                                                                                                                                                                                                                                                                                                                                                                                                                                                                                                                                                                                                                                                                                                                                                                                                                                                                                                                                                          |

| Authors, Year, Journal                                                                          | Study design: Cohorts /country          | Population and setting                                                                               | Objectives                                                                                                                                                                                    | Resources (when available)                                                                                                                                                                                                                                                                                                                                                                                                            | Main findings & comments                                                                                                                                                                                                                                                                                                                                                                                                                                                                                                                                                                                                                                                                                                                                                                                                                                           |
|-------------------------------------------------------------------------------------------------|-----------------------------------------|------------------------------------------------------------------------------------------------------|-----------------------------------------------------------------------------------------------------------------------------------------------------------------------------------------------|---------------------------------------------------------------------------------------------------------------------------------------------------------------------------------------------------------------------------------------------------------------------------------------------------------------------------------------------------------------------------------------------------------------------------------------|--------------------------------------------------------------------------------------------------------------------------------------------------------------------------------------------------------------------------------------------------------------------------------------------------------------------------------------------------------------------------------------------------------------------------------------------------------------------------------------------------------------------------------------------------------------------------------------------------------------------------------------------------------------------------------------------------------------------------------------------------------------------------------------------------------------------------------------------------------------------|
| Shanbhag P, Staton EW, Bose-Brill S, Lin CT, et al 2020<br>Journal of medical internet research | retrospective<br><br>USA                | through the University of Colorado Health patient portal-data collected between January and May 2020 | electronic patient portal before and during COVID-19 pandemic                                                                                                                                 | Organization. URL: <a href="https://www.nhpco.org/patients-and-caregivers/advance-care-planning/">https://www.nhpco.org/patients-and-caregivers/advance-care-planning/</a><br><br>Advance Care Planning: Healthcare Directives. National Institute on Aging. URL: <a href="https://www.nia.nih.gov/health/advance-care-planning-healthcare-directives">https://www.nia.nih.gov/health/advance-care-planning-healthcare-directives</a> | 6819 in April and 10,077 in May 2020. The total number of monthly ACP portal tool users increased from 418 in January to 1037 in April, then slightly decreased to 815 users in May. The weekly rate of Power of Attorney (POA) completions was 2.4-fold higher in the 9 weeks after 26 March 2020, compared to the 9 weeks prior, and this was the main use of the ACP portal (95.3%). The majority of users were female (67%), consistent with other evidence that males report less familiarity with concepts of ACP and POA. The mean age was 47.7 years (SD 16.1) and the largest age group of users were 25-34 years old - maybe because in Colorado, 33% of people diagnosed with COVID-19 were 20-39 years old, thus there was greater awareness about the importance of ACP even in the young and they are more likely to engage with an online platform. |
| Rabow MW, Keyssar JR, Long J, et al 2021<br>American journal of Hospice & Palliative medicine   | Cohort study – retrospective<br><br>USA | The MERI Centre at UCSF, USA, provides primary palliative care education to health care teams        | To outline the patient, family and professional education efforts of one palliative care education centre and detail the adjustments necessary and opportunities found in the COVID-19 crisis |                                                                                                                                                                                                                                                                                                                                                                                                                                       | The MERI centre runs a 2-part ACP workshop called "What matters most?". There was major growth in attendance during COVID-19. From April-December 2020, there were 125 participants (compared to 47 people in the 7 months prior to COVID-19). Key lessons about palliative care education during a global pandemic;<br>1. Online learning has numerous advantages including allowing for increased participation and scale not possible with in-person learning, including national and international participants.<br>2. Intimacy and meaning are possible, and sometimes promoted, by the safety, convenience, and interactivity of online relationships.<br>3. The importance of palliative care education for frontline health care workers and for patients and their loved ones has been highlighted by the fear, disruption, and grief of the pandemic.    |
| Valeri AM, Robbins-Juarez SY, Stevens JS, et al 2020<br>J Am Soc Nephrol                        | Cohort study – retrospective<br><br>USA | Patients with ESKD on dialysis admitted to a New York City hospital with COVID-19                    | To examine presentation and outcomes of COVID-19 in patients with End stage kidney disease (ESKD) on dialysis                                                                                 |                                                                                                                                                                                                                                                                                                                                                                                                                                       | 59 patients were identified and the majority were on haemodialysis (n=57). Median age was 63 years, 56% were male and 75% were Hispanic ethnicity. 31% (n=18) of patients died in hospital - this group were older and had a higher Charlson comorbidity index. 14% (n=8) received mechanical ventilation - 75% of whom died. 19% (n=11) died with a "do not intubate" order.<br><br>The presentation of patients on dialysis with COVID-19 was similar to that of the general population. Patients with advanced age and comorbidities are at the highest risk of severe COVID-19 manifestations. A high percentage of those who died had expressed wishes against intubation and mechanical ventilation, reflecting mandatory discussion and documentation of advanced directive in dialysis patients in America.                                                |



GUIDELINES

| Authors,<br>Year,<br>Journal                                                                                         | Country           | Objectives                                                                                                                                                        | Resources (when available)                                                                                                                                                                                                                                                                                                                              | Main findings & comments                                                                                                                                                                                                                                                                                                                                                                                                                                                                                                                                                                                                                                                                                                                                                                                                                                                                                                                                                                                                                                                                                                                                                                                                                                                                                 |
|----------------------------------------------------------------------------------------------------------------------|-------------------|-------------------------------------------------------------------------------------------------------------------------------------------------------------------|---------------------------------------------------------------------------------------------------------------------------------------------------------------------------------------------------------------------------------------------------------------------------------------------------------------------------------------------------------|----------------------------------------------------------------------------------------------------------------------------------------------------------------------------------------------------------------------------------------------------------------------------------------------------------------------------------------------------------------------------------------------------------------------------------------------------------------------------------------------------------------------------------------------------------------------------------------------------------------------------------------------------------------------------------------------------------------------------------------------------------------------------------------------------------------------------------------------------------------------------------------------------------------------------------------------------------------------------------------------------------------------------------------------------------------------------------------------------------------------------------------------------------------------------------------------------------------------------------------------------------------------------------------------------------|
| Farrell TW,<br>Ferrante LE,<br>Brown T, et al<br>2020<br>J Am Geriatr Soc                                            | USA<br>Guidelines | To inform stakeholders about ethical considerations to consider when developing strategies for allocating scarce resources during COVID-19 involving older adults | <a href="https://www.americangeriatrics.org/where-we-stand/covid-19">https://www.americangeriatrics.org/where-we-stand/covid-19</a>                                                                                                                                                                                                                     | Three key considerations are discussed;<br>1. Urgent need for ACP - ACP is important to reduce the need to ration limited health care resources during an emergency because these discussions will identify people who do not wish to receive intensive care, including mechanical ventilation.<br>2. Achieving justice in resource allocation - a preference for distributive justice that maximizes relevant clinical factors and either de-emphasizes or eliminates factors that place an arbitrary and disproportionate weight on advanced age.<br>3. Legal considerations - The position statement includes:<br>(a) avoiding age per se as a means for excluding anyone from care;<br>(b) assessing comorbidities and considering the disparate impact of social determinants of health;<br>(b) encouraging decision makers to focus primarily on potential short-term (not long-term) outcomes;<br>(d) avoiding ancillary criteria such as —life-years saved and long-term predicted life expectancy that might disadvantage older people;<br>(e) forming and staffing triage committees tasked with allocating scarce resources;<br>(f) developing institutional resource allocation strategies that are transparent and applied uniformly;<br>(g) facilitating appropriate advance care planning |
| Janssen DJA,<br>Ekstroem M,<br>Currow DC,<br>Johnson MJ,<br>Maddocks M,<br>Simonds AK, et al<br>2020<br>Eur Respir J | UK<br>Guidelines  | To make consensus recommendations for palliative care for patients with COVID-19                                                                                  | 90 international experts invited to complete an online survey including stating their agreement, or not, with 14 potential recommendations<br><br>ERS Guidelines<br><a href="https://www.ersnet.org/covid-19/covid-19-guidelines-and-recommendations-directory/">https://www.ersnet.org/covid-19/covid-19-guidelines-and-recommendations-directory/</a> | 68 (75.6%) experts, from 15 countries and mostly physicians, responded in the first round and consensus (70% agreement) was achieved on 13 recommendations based upon indirect evidence and clinical experience.<br>Recommendations relevant to ACP include:<br>1) ACP should be routinely performed or reviewed by clinicians with patients and their loved ones at diagnosis of serious COVID-19.<br>2) ACP should be re-evaluated prior to discharge of recovered COVID-19 patients from hospital.<br>3) Staff taking care of patients with serious COVID-19 should receive training in online clinician–family communication (while using telephone or video conferencing).<br>Barriers to ACP; COVID-19 evolves rapidly resulting in lack of clarity on the patient’s condition preventing long-term planning, patients may be too ill or too anxious to participate in ACP, family are not physically present to participate in ACP. Healthcare professionals rely on in-person and non-verbal cues to facilitate difficult conversations and may be reluctant to discuss sensitive topics during phone or video consultations. Remote communication is more challenging for                                                                                                                       |

| Authors, Year, Journal                                                      | Country             | Objectives                                                                                                                                                                                                                                                    | Resources (when available)                                                                                                                                                                                                                                                                                     | Main findings & comments                                                                                                                                                                                                                                                                                                                                                                                                                                                                       |
|-----------------------------------------------------------------------------|---------------------|---------------------------------------------------------------------------------------------------------------------------------------------------------------------------------------------------------------------------------------------------------------|----------------------------------------------------------------------------------------------------------------------------------------------------------------------------------------------------------------------------------------------------------------------------------------------------------------|------------------------------------------------------------------------------------------------------------------------------------------------------------------------------------------------------------------------------------------------------------------------------------------------------------------------------------------------------------------------------------------------------------------------------------------------------------------------------------------------|
|                                                                             |                     |                                                                                                                                                                                                                                                               |                                                                                                                                                                                                                                                                                                                | people with low literacy or few digital literacy skills, and people with sight or hearing impairment.                                                                                                                                                                                                                                                                                                                                                                                          |
| Kuzuya M, Aita K, Katayama Y, Katsuya T, et al 2020<br>Geriatr Gerontol Int | Japan<br>Guidelines | To make ethical suggestions aimed at achieving a society in which older patients can receive the best medical and long-term care they deserve, even during the COVID-19 pandemic. In particular, to consider the timing and importance of ACP implementation. | The Japan Geriatrics Society "Guidelines for the decision-making processes in medical and long-term care for the elderly". [Cited 5 Aug 2020]. Available from URL: <a href="https://www.jp-geriat-soc.or.jp/proposal/guideline.html">https://www.jp-geriat-soc.or.jp/proposal/guideline.html</a> (in Japanese) | Recommendations relevant to ACP include:<br>1.2. ACP should be promoted to ensure the right to "best medical and long-term care" until the end-of-life.<br>1.3. The end-of-life care desired by older persons should be guaranteed.<br>2.1. Medical information needs to be shared with the patient and family, and active decision support needs to be provided.<br>2.2. It is necessary to ensure communication between the older person and family, and medical and long-term care workers. |

## REVIEWS

| Authors, Year, Journal                                               | Country<br>Study design | Objectives                                                                                                                                                                                                                                                                                             | Main findings & comments                                                                                                                                                                                                                                                                                                                                                                                                                                                                                                                                                                                                                                                                                                                                                                                                                      |
|----------------------------------------------------------------------|-------------------------|--------------------------------------------------------------------------------------------------------------------------------------------------------------------------------------------------------------------------------------------------------------------------------------------------------|-----------------------------------------------------------------------------------------------------------------------------------------------------------------------------------------------------------------------------------------------------------------------------------------------------------------------------------------------------------------------------------------------------------------------------------------------------------------------------------------------------------------------------------------------------------------------------------------------------------------------------------------------------------------------------------------------------------------------------------------------------------------------------------------------------------------------------------------------|
| Farrell TW, Francis L, Brown T, et al 2020<br>J Am Geriatr Soc       | USA<br>Narrative review | a companion manuscript to the American Geriatrics Society position statement (also by Farrell et al 2020), intended to inform stakeholders about ethical considerations that should be considered when developing strategies for allocation of scarce resources during COVID-19 involving older adults | Three key consideration as described above.<br>Value of individual choice and advance directives - respect for autonomy is an important moral consideration and patient choice should be honoured. In emergency situations like COVID-19, identification of the patient's surrogate decision maker is especially important.<br>It urges caution on 2 aspects of ACP during COVID-19;<br>1. Critically ill COVID-19 patients may not have ACP or be in a position to make their wishes known - in this case, they should not be pressured to make care decisions based on conserving resources.<br>2. Physicians should not engage in pre-emptive rationing, where pressure is placed on older adults to reconsider their ACP or elect for Do-not-resuscitate orders                                                                           |
| Gilissen J, Pivodic L, Unroe KT, et al 2020<br>J Pain Symptom Manage | USA<br>Narrative review | To identify, review, and compare national and international COVID-19 guidance for nursing homes concerning palliative care, issued by government bodies and professional associations                                                                                                                  | 21 eligible documents were identified. International documents focused primarily on infection prevention and control, including only a few sentences on palliative care related topics. Palliative care themes most frequently mentioned end-of-life visits, ACP documentation, and clinical decision making toward the end of life (focusing on hospital transfers).<br>In relation to ACP;<br>- 14 documents mention ACP primarily in relation to transfers to hospital and/or focused primarily on written plans or orders to guide emergency situations.<br>- 8 documents state that consulting a person's ACP is crucial when deciding whether they should be hospitalized.<br>- A matter of urgency is acknowledged in all documents, stating that residents' advance directives/advance care plans should be completed and up to date. |

| Authors,<br>Year,<br>Journal                                                                              | Country<br>Study design            | Objectives                                                                                                                                                      | Main findings & comments                                                                                                                                                                                                                                                                                                                                                                                                                                                                                                                                                                                                                                                                                                                                                                                                                                                                                                                                                                                                                                                                                                                                                                                                                                                                                                                                                                                                                                                                                                                                                                                                                                                  |
|-----------------------------------------------------------------------------------------------------------|------------------------------------|-----------------------------------------------------------------------------------------------------------------------------------------------------------------|---------------------------------------------------------------------------------------------------------------------------------------------------------------------------------------------------------------------------------------------------------------------------------------------------------------------------------------------------------------------------------------------------------------------------------------------------------------------------------------------------------------------------------------------------------------------------------------------------------------------------------------------------------------------------------------------------------------------------------------------------------------------------------------------------------------------------------------------------------------------------------------------------------------------------------------------------------------------------------------------------------------------------------------------------------------------------------------------------------------------------------------------------------------------------------------------------------------------------------------------------------------------------------------------------------------------------------------------------------------------------------------------------------------------------------------------------------------------------------------------------------------------------------------------------------------------------------------------------------------------------------------------------------------------------|
|                                                                                                           |                                    |                                                                                                                                                                 | <ul style="list-style-type: none"> <li>- In U.S. documents, it is added that written physician orders must reflect patients' wishes.</li> <li>- 7 documents are more specific to what the advance care plan should at least entail (e.g. Power of attorney, CPR, admission to hospital, intubation, non-invasive ventilation, fluids, antibiotics).</li> <li>- 4 documents acknowledge that plans may need to be made in emergency situations, with little time available. - 6 documents highlight the importance of involving representatives/family in goal-setting or ACP.</li> <li>- 3 documents explicitly state that ACP is a person-centred approach to care, that involves "effective" or "adequate, sympathetic" communication and a thorough understanding of a person's life, values, priorities, and preferences.</li> </ul> <p>Overall, ACP is mentioned in many documents but is discussed in a very limited way. The emphasis lies on treatment preferences in writing while the actual communication process is less frequently mentioned.</p>                                                                                                                                                                                                                                                                                                                                                                                                                                                                                                                                                                                                            |
| <p>Gupta A, Bahl B, Rabadi S, Mebane A, 3rd, Levey R, Vasudevan V<br/>2021<br/>Am J Hosp Palliat Care</p> | <p>USA<br/>Narrative review</p>    | <p>To describe the challenges and unique opportunities of ACP in the COVID-19 era.</p>                                                                          | <p>Benefits of ACP; respect patient autonomy, lower costs to healthcare system due to reduction in aggressive treatment, leading to a potential reduction in resource competition during COVID-19.</p> <p>Barriers to ACP;</p> <p>a) Patient factors - poor uptake due to some reticence to discuss End of Life Care, patients not willing to raise ACP with clinicians, ACP uses difficult to understand language, the perception that ACP can be inconsistent with patient goals. The distribution of ACP is unequal across races – it is higher in the elderly, white population and critically ill, but lower in ethnic minorities with lower SES. This disparity is driven by experiences of discrimination and mistrust of HCW. Ethnic minorities are more likely to have appointed a Next of Kin, but less likely to have documented ACP, leading to increased stress on substitute decision makers.</p> <p>b) Healthcare factors - clinicians may delay end of life conversations due to inaccurate prognosis, the focus on ACP in hospital &amp; during critical illness delays difficult conversations until necessary, reluctance to take away patients' hope of recovery. All stems from lack of ACP training for clinicians &amp; paucity of palliative care medical education. Also varying rates of adherence to and implementation of ACP.</p> <p>Suggestions to increase ACP; increase patient access to online health records to facilitate documentation of ACP, increase frequency of requests to complete ACP, take advantage of key occasions to complete ACP (e.g. admission to nursing home), increase educational &amp; awareness campaigns.</p> |
| <p>Liao CT, Chang WT, Yu WL, et al<br/>2020<br/>Rev Cardiovasc Med</p>                                    | <p>Taiwan<br/>Narrative review</p> | <p>To provide guidance for the management of critical cardiovascular disease during the COVID-19 pandemic</p>                                                   | <p>The article details management of patients with COVID-19 and;</p> <ul style="list-style-type: none"> <li>- acute coronary syndromes</li> <li>- cardiogenic shock</li> <li>- acute heart failure</li> <li>- CPR</li> </ul> <p>ACP should be prioritised and discussed early to avoid high-intensive care and non-beneficial treatments. Patient's goals and expectations should be discussed and shared with their proxies.</p>                                                                                                                                                                                                                                                                                                                                                                                                                                                                                                                                                                                                                                                                                                                                                                                                                                                                                                                                                                                                                                                                                                                                                                                                                                         |
| <p>Salins N, Mani RK, Gursahani R, et al<br/>2020<br/>Indian J Crit Care Med</p>                          | <p>India<br/>Narrative review</p>  | <p>To address the symptom management and supportive care strategies in patients with COVID-19 who are suitable for intensive care treatment and ventilation</p> | <p>19% of COVID-19 patients develop severe illness requiring hospitalisations, and breathlessness is the most common symptom in patients needing ICU treatment.</p> <p>The article includes details on management of COVID-19 patients suffering from:</p> <ul style="list-style-type: none"> <li>- breathlessness</li> <li>- delirium</li> <li>- respiratory secretions</li> <li>- pain</li> <li>- intractable symptoms and end-of-life care</li> </ul> <p>The suffering of patients with COVID-19 and their families is both physical and psychological, social and spiritual. As such, the demand for palliative care services is increased. It is important to discuss goals of care with patients and</p>                                                                                                                                                                                                                                                                                                                                                                                                                                                                                                                                                                                                                                                                                                                                                                                                                                                                                                                                                            |

| Authors,<br>Year,<br>Journal                                                                                              | Country<br>Study design | Objectives                                                                                                                                                                                                | Main findings & comments                                                                                                                                                                                                                                                                                                                                                                                                                                                                                                                                                                                                                                                                                                                                                                                                                                                                                                                                                                                                                                                                                                                                                                                                                                                                                                                                             |
|---------------------------------------------------------------------------------------------------------------------------|-------------------------|-----------------------------------------------------------------------------------------------------------------------------------------------------------------------------------------------------------|----------------------------------------------------------------------------------------------------------------------------------------------------------------------------------------------------------------------------------------------------------------------------------------------------------------------------------------------------------------------------------------------------------------------------------------------------------------------------------------------------------------------------------------------------------------------------------------------------------------------------------------------------------------------------------------------------------------------------------------------------------------------------------------------------------------------------------------------------------------------------------------------------------------------------------------------------------------------------------------------------------------------------------------------------------------------------------------------------------------------------------------------------------------------------------------------------------------------------------------------------------------------------------------------------------------------------------------------------------------------|
|                                                                                                                           |                         |                                                                                                                                                                                                           | their families, to ascertain preferences about treatment and place of care. In particular, elderly patients with co-morbidities, organ failure, cancer and impairment who have COVID-19, should have the advantages and disadvantages of ventilation and ICU treatment explained. This is to avoid ICU admissions in COVID-19 patients who are unlikely to benefit. Early ACP also spares patients and families from complex triage discussions.                                                                                                                                                                                                                                                                                                                                                                                                                                                                                                                                                                                                                                                                                                                                                                                                                                                                                                                     |
| Selman L,<br>Lapwood S, Jones N, Pocock L, Anderson R, Pilbeam C, et al<br>2020<br>The Centre for Evidence-Based Medicine | UK<br>Narrative review  | To synthesise recent evidence regarding ACP in community settings, considering its implications with respect to COVID-19, and highlight existing guidelines and resources.                                | 203 records were screened and 21 research studies and 10 systematic reviews met inclusion criteria. 12 guidelines also identified.<br>Barriers to ACP in light of COVID-19;<br>a) Individual level - lack of consumer knowledge about ACP, perceived irrelevance of ACP, lack of trust and cultural reluctance to discuss death, speed of deterioration not allowing time to discuss ACP.<br>b) Interpersonal level - role ambiguity (Doctor and patient expectations that the other will initiate ACP discussion), social distancing prohibiting face-to-face ACP conversations, family shock and grief not conducive to discussing ACP.<br>c) Clinician level - lack of clinician knowledge, skill, confidence, time to initiate ACP and concern it will deprive patients of hope and create anxiety.<br>d) System level - lack of linkages and mechanism for sharing ACP, lack of funding, lack of standardisation of templates, tool, IT systems.<br>Enablers to ACP in light of COVID-19; increased public awareness and education on ACP, COVID-19 provides a trigger to initiate ACP discussion, increased attention on IT systems, development of new templates and tools to facilitate ACP, uptake of video and tele-health facilitating remote ACP, unique opportunity to create integrated web-based systems for ACP linked to electronic medical records |
| Selman LE, Chao D, Sowden R, Marshall S, Chamberlain C, Koffman J<br>2020<br>Journal of Pain & Symptom Management         | UK<br>Narrative review  | To review bereavement risk factors in COVID-19 and provide evidence-based recommendations for how to support bereaved relatives.                                                                          | Bereavement risk factors in COVID-19 include patient isolation, limited family access, virtual communication and lack of ACP. In particular, relevant to ACP;<br>- If no ACP is documented, a patient's values and preferences for high-intensity treatments cannot be known, and leaves family members ill-prepared for their death.<br>- Personal protective equipment depersonalises and complicates face-to-face ACP communication, especially for the hearing impaired and frail.                                                                                                                                                                                                                                                                                                                                                                                                                                                                                                                                                                                                                                                                                                                                                                                                                                                                               |
| Vipperman A, Zimmerman S and Sloane PD<br>2021<br>J Am Med Dir Assoc                                                      | USA<br>Narrative review | To summarize recommendations issued by key organizations related to COVID-19 in Assisted Living Communities, focussing in healthcare and quality of life.                                                 | Recommendations on ACP:<br>- Staff should receive training on ACP and serve as a conduit for primary care providers, to have these discussions with residents<br>- The resident's goals of care should be considered when making transfer decisions in relation to COVID-19.                                                                                                                                                                                                                                                                                                                                                                                                                                                                                                                                                                                                                                                                                                                                                                                                                                                                                                                                                                                                                                                                                         |
| West E, Moore K, Kupeli N, Sampson EL, Nair P, Aker N, et al<br>2021<br>Age Ageing                                        | UK<br>Narrative review  | To explore key factors that influence Place of care and Place of death decisions in older adults and to investigate key factors that influence the process and outcome of these decisions in older adults | 533 papers were identified and 10 papers met inclusion criteria. In terms of ACP, it is a welcomed process in nursing homes and community settings. There is limited evidence that ACP support proxies to make consistent healthcare decisions. The evidence showing good accord between patient and proxy decisions is lacking. ACP engagement and comprehension levels differ based on income level, patient attitudes, comfort with and trust in the healthcare system. Care should be taken to ensure that access to ACP services and interventions is culturally appropriate and based on patient values. In the COVID-19 context, ACP needs to be continually renegotiated and reconsidered as one's health status and care options change.                                                                                                                                                                                                                                                                                                                                                                                                                                                                                                                                                                                                                    |

| Authors, Year, Journal                                                     | Country Study design        | Objectives                                                                                                                                                                                                          | Main findings & comments                                                                                                                                                                                                                                                                                                                                                                                                                                                                                                                                                                                                                                                                                                                                                                                                                                                                                                                                                                                                                                                                                                                                                                                                                                                                                                                                                                                                                                                                                                                                                                                                                                                                                                                                                |
|----------------------------------------------------------------------------|-----------------------------|---------------------------------------------------------------------------------------------------------------------------------------------------------------------------------------------------------------------|-------------------------------------------------------------------------------------------------------------------------------------------------------------------------------------------------------------------------------------------------------------------------------------------------------------------------------------------------------------------------------------------------------------------------------------------------------------------------------------------------------------------------------------------------------------------------------------------------------------------------------------------------------------------------------------------------------------------------------------------------------------------------------------------------------------------------------------------------------------------------------------------------------------------------------------------------------------------------------------------------------------------------------------------------------------------------------------------------------------------------------------------------------------------------------------------------------------------------------------------------------------------------------------------------------------------------------------------------------------------------------------------------------------------------------------------------------------------------------------------------------------------------------------------------------------------------------------------------------------------------------------------------------------------------------------------------------------------------------------------------------------------------|
| Bolt SR, van der Steen JT, Mujezinović I, et al<br>2021<br>Int J Nurs Stud | Netherlands<br>Rapid review | To formulate practice recommendations for nursing staff with regard to providing palliative dementia care in times of COVID-19                                                                                      | 23 documents were included. Articles specifically addressing palliative care in dementia in relation to COVID-19 were limited. Recommendations relevant to ACP include;<br>1. Nursing and medical staff should collaborate to review (existing) ACP.<br>2. Ideally ACP before a diagnosis of COVID-19 and before the person with dementia loses cognitive capacity. Provide patients and families with information and guidance to facilitate ACP. Consider utilising decision aids to support families.<br>3. Facilitate timely ACP by introducing the COVID-19 subject and discuss potential scenarios and end-of-life care options.<br>4. Be aware that ACP conversations may be coloured by fears or emotions induced by the COVID-19 pandemic.<br>5. Consider using ACP conversations to identify anticipatory grief and to provide information on bereavement preparation in times of COVID-19.<br>6. Make sure to document wishes clearly in transferable (digital) files that should be available and accessible at all times for different care agencies and care personnel.<br>7. During this pandemic, nursing staff may discuss the preferred place of death with persons with dementia, before potential infection. Keep in mind that a familiar environment is likely preferred over a hospital.<br>8. Complex decisions about hospitalization related to COVID-19 should be discussed in a multi-disciplinary team (MDT).<br>9. For people with dementia who have COVID-19, discuss goals of care with the patient and MDT as soon as possible and revise care goals as the situation changes.<br>10. Be sensitive to family members and proxy decision-makers, who may have to make hasty, difficult and emotive decisions on behalf of their relative. |
| McMahan RD, Tellez I, Sudore RL<br>2021<br>J Am Geriatr Soc                | USA<br>Scoping review       | To describe the existing ACP landscape, conduct a scoping review of recent randomized trials in the past decade to describe current ACP interventions and outcomes, and provide recommendations for future research | Of 1464 articles identified, 69 Randomised Control Trials met eligibility and 94% were rated high quality. The ACP definitions, age criteria, diseases and settings varied. The interventions medium was also varied, and included discussions, video, interactive multimedia, written form and clinician training. Outcomes for all ACP interventions were predominantly positive.                                                                                                                                                                                                                                                                                                                                                                                                                                                                                                                                                                                                                                                                                                                                                                                                                                                                                                                                                                                                                                                                                                                                                                                                                                                                                                                                                                                     |

#### CASE SERIES/CROSS-SECTIONAL

| Authors, Year, Journal                                              | Country Study design | Objectives                                                                                                                                | Population and setting                                                                 | Main findings & comments                                                                                                                                                                                                                                                                                                                                                                                      |
|---------------------------------------------------------------------|----------------------|-------------------------------------------------------------------------------------------------------------------------------------------|----------------------------------------------------------------------------------------|---------------------------------------------------------------------------------------------------------------------------------------------------------------------------------------------------------------------------------------------------------------------------------------------------------------------------------------------------------------------------------------------------------------|
| Biswas S, Adhikari SD, Bhatnagar S<br>2020<br>Indian J Palliat Care | India<br>Case series | To share the experience of three patients with advanced cancer where telemedicine was used for the process of providing End-of-life care. | Palliative care services in India, in particular the cases of 3 patients with advanced | Case 1; 68 year old male with metastatic lung cancer. His main symptom was dyspnoea. Telemedicine used to assess symptoms and advise on management, including titration of opioids and use of fan. Psychological support provided to carers and ACP discussed.<br>Case 2; 45 year old female with metastatic cholangiocarcinoma. Telemedicine used to identify terminal breathing. ACP discussed with family. |

| Authors, Year, Journal                                          | Country Study design      | Objectives                                                                                                                                               | Population and setting                                                                                                                             | Main findings & comments                                                                                                                                                                                                                                                                                                                                                                                                                                                                                                                                                                                                                                                                                                                                                                                                                                                                                                                                                                                                                                                                                                                                                                                                                                                                                                                                                                                                                                                                                                                                                                                                                                                                      |
|-----------------------------------------------------------------|---------------------------|----------------------------------------------------------------------------------------------------------------------------------------------------------|----------------------------------------------------------------------------------------------------------------------------------------------------|-----------------------------------------------------------------------------------------------------------------------------------------------------------------------------------------------------------------------------------------------------------------------------------------------------------------------------------------------------------------------------------------------------------------------------------------------------------------------------------------------------------------------------------------------------------------------------------------------------------------------------------------------------------------------------------------------------------------------------------------------------------------------------------------------------------------------------------------------------------------------------------------------------------------------------------------------------------------------------------------------------------------------------------------------------------------------------------------------------------------------------------------------------------------------------------------------------------------------------------------------------------------------------------------------------------------------------------------------------------------------------------------------------------------------------------------------------------------------------------------------------------------------------------------------------------------------------------------------------------------------------------------------------------------------------------------------|
|                                                                 |                           |                                                                                                                                                          | cancer are discussed                                                                                                                               | Case 3; 52 year old female with metastatic gallbladder carcinoma. Telemedicine used to assess discomfort and restlessness. Terminal event identified and managed with family. Telemedicine during COVID-19 enables connection with dying patients in remote locations, facilitates shared-decision making and ACP. It allows carers to be guided in symptom management, as well as providing psychological support to bereaved families.                                                                                                                                                                                                                                                                                                                                                                                                                                                                                                                                                                                                                                                                                                                                                                                                                                                                                                                                                                                                                                                                                                                                                                                                                                                      |
| Kotze C, Roos JL 2020 S Afr Fam Pract                           | South Africa Case report  | To highlight the complexity of capacity assessments and ACP in people with serious mental illness (SMI)                                                  | 72 year old female with treatment resistant schizophrenia and terminal cancer                                                                      | The case discusses the difficulties of assessing end-of-life decision-making capacity in people with SMI, using this patient as an example. Older people with SMI are able to engage in ACP and have decision-making capacity about their end-of-life care preferences, however people with SMI are significantly less likely to access palliative care services. More research about palliative care and ACP for people with SMI is needed and is urgent in light of the COVID-19 pandemic.                                                                                                                                                                                                                                                                                                                                                                                                                                                                                                                                                                                                                                                                                                                                                                                                                                                                                                                                                                                                                                                                                                                                                                                                  |
| Rivet EB, Blades CE, Hutson M, et al 2020 Am Surg               | USA Case report           | To highlight the elements of high-quality ACP in the surgical context                                                                                    | 74-year-old female with multiple comorbidities who had ACP discussions in the context of proposed surgery for colon cancer                         | The patient was diagnosed with colon cancer, and noted to have multiple medical conditions and decreased functional status, as well as concerns for her decision-making capacity. Surgery was delayed due to COVID-19 pandemic. An ACP conversation was had prior to the planned surgery which later formed the basis of her healthcare proxy (HCP) to limit interventions (like CPR and intubation) when the patient contracted COVID-19.<br>Key points included;<br>1. For best outcomes, ACP conversations should occur before a crisis, allowing patients to understand ACP options and reflect on personal values and care preferences. ACP should be revisited over time as circumstances change.<br>2. ACP conversations should occur whilst the patient has capacity.<br>3. Including HCPs in ACP discussion is beneficial for the patient, proxy and health care team.<br>4. Skilful ACP conversations help patients to distinguish between desired and undesired outcomes and can define a patient's acceptable levels of function, allowing better definition of treatment limitations.<br>5. The meaning of quality-of-life statements vary considerably between patients.<br>6. Individuals who request full active treatment are usually able to describe a point at which they would be willing to accept a natural death. Having individuals reflect on potential outcomes might help them articulate their goals and the circumstances under which they would want to limit treatment.<br>7. Elective surgical intervention provides an opportunity for ACP conversations, by engaging patients in discussions about the goals of care, and potential avoids undesired care. |
| Nguyen AL, Davtayan M, Taylor J, et al 2021 Front Public Health | USA Cross-sectional study | To assess advance directive completion, healthcare proxy (HCP), and attitudes toward ACP among older adults living with HIV during the COVID-19 pandemic | People, 50 years or older, living with HIV, in the Coachella Valley, California USA were administered internet-based surveys from April-June 2020. | 100 subjects responded to the survey - mean age was 64.2 years, most were non-Hispanic white (88.0%) and men (96.0%). Most reported having an advance directive (59.6%) or HCP (67.3%). Most (57.6%) believed ACP to be more important now compared to the pre-pandemic era. Having an advance directive was associated with increase in age, higher education, living with other people, never having an AIDS diagnosis, and current undetectable viral load ( $p < 0.05$ ). Having a HCP was associated with higher education, being married/partnered, and living with other people ( $p < 0.05$ )                                                                                                                                                                                                                                                                                                                                                                                                                                                                                                                                                                                                                                                                                                                                                                                                                                                                                                                                                                                                                                                                                         |

COMMENTARIES

| serial no. | Authors, Year, Journal                                              | country | Objectives                                                                                                                                                                       | Resources (when available)                                                                                                                                                              | Barriers to ACP                                                                                                                                                                                                                                                                                                                                                                                                                                                                             | Enablers of ACP                                                                                                                                                                                                                                                          | Benefits of ACP & other themes                                                                                                                                                                                                                                                                                                                                                                                                                                                                                                                                                                                                                  |
|------------|---------------------------------------------------------------------|---------|----------------------------------------------------------------------------------------------------------------------------------------------------------------------------------|-----------------------------------------------------------------------------------------------------------------------------------------------------------------------------------------|---------------------------------------------------------------------------------------------------------------------------------------------------------------------------------------------------------------------------------------------------------------------------------------------------------------------------------------------------------------------------------------------------------------------------------------------------------------------------------------------|--------------------------------------------------------------------------------------------------------------------------------------------------------------------------------------------------------------------------------------------------------------------------|-------------------------------------------------------------------------------------------------------------------------------------------------------------------------------------------------------------------------------------------------------------------------------------------------------------------------------------------------------------------------------------------------------------------------------------------------------------------------------------------------------------------------------------------------------------------------------------------------------------------------------------------------|
| 1          | Adams C<br>2020<br>J Pain Symptom Manage                            | USA     | To describe the challenges in communication experienced during COVID-19, particularly in discussing goals of care                                                                |                                                                                                                                                                                         | During COVID-19; fear and uncertainty causing heightened emotions, visitor restrictions impair communication with patients and families, loss of visual cues and body language when communicating over the phone, difficulty building trust and showing empathy via phone conversation                                                                                                                                                                                                      |                                                                                                                                                                                                                                                                          | Recommendations to proactively utilise the palliative care workforce:<br>1. Triage goals of care conversations in hospitalised patients - strong presence in ED and ICU, develop surge plan for staffing and prioritisation, utilise telemedicine to limit exposure<br>2. Address potential for limited resources - advocate for policies addressing resource allocation, assist ICU with goals of care discussions, review policies around DNR<br>3. Proactively engage in goals of care conversations in the community - identify patients at high risk for hospitalisation, engage in advance care planning (ACP) with these patients        |
| 2          | Back A, Tulsky JA, Arnold RM<br>2020<br>Ann Intern Med              | USA     | To describe the importance of communication during COVID-19                                                                                                                      | Free download of VitalTalk app<br><a href="https://download.cnet.com/VitalTalk-Tips/3000-20414_4-78571628.html">https://download.cnet.com/VitalTalk-Tips/3000-20414_4-78571628.html</a> |                                                                                                                                                                                                                                                                                                                                                                                                                                                                                             |                                                                                                                                                                                                                                                                          | The creators of a serious illness communication skills training program (VitalTalk) advocate for 3 core principles when communicating in the COVID-19 pandemic;<br>1) dealing with emotion is more important than giving lots of information<br>2) information is best delivered in small packets that start with a headline<br>3) patient values should be at the heart of medical treatment plans<br>COVID-19 however introduces a caveat to the third principle due to the stress on resource allocation and crisis standards.                                                                                                               |
| 3          | Ballantyne A, Rogers WA, Entwistle V, et al<br>2020<br>J Med Ethics | NZ      | To argue that the concern about achieving equity in ICU triage during COVID-19 is problematic and that the focus should be on providing the highest standard of end-of-life care |                                                                                                                                                                                         | Differences between what patients/families and healthcare workers (HCW) consider most important at the end of life. Some doctors feel uncomfortable discussing ACP with patients/families. Time-poor HCW have limited capacity to discuss ACP and support families through complex discussions. During COVID-19, challenges to ACP are exacerbated by uncertainty and urgency, the absence of family support (due to visitor restrictions) and the wearing of Personal Protective Equipment | Specialist COVID-19 communication support teams, based in ICU, could support HCW by managing ACP, thus reducing the moral and psychological distress of HCW. Proactive ACP prior to illness, without constraints of PPE or limited time, and including carers, is ideal. | Mortality is high in those patients with COVID-19 who require ICU admission and mechanical ventilation. Morbidity post ICU and carer-burden is also high. These factors undermine the utility argument for ICU admission in COVID-19 patients and challenge the view that disadvantaged groups should receive preferential access to ICU treatment. Rather priority should be given to palliative care, good communication and ACP. Tokenistic gestures to equity should be avoided — i.e. admitting patients with poor prognostic indicators to ICU to meet an equity target when intensive critical care is contrary to their best interests. |

|   |                                                     |     |                                                                                                      |                                                                                                                                                                                                                                                                                                                                                                                                                                                                                                                                                                                                                                                                                                                                                                                                                                                                                                                                                                                                 |                                                                                                                                                                                                                                                                                                             |                                                                                                                                                                                                           |                                                                                                                                                                                             |
|---|-----------------------------------------------------|-----|------------------------------------------------------------------------------------------------------|-------------------------------------------------------------------------------------------------------------------------------------------------------------------------------------------------------------------------------------------------------------------------------------------------------------------------------------------------------------------------------------------------------------------------------------------------------------------------------------------------------------------------------------------------------------------------------------------------------------------------------------------------------------------------------------------------------------------------------------------------------------------------------------------------------------------------------------------------------------------------------------------------------------------------------------------------------------------------------------------------|-------------------------------------------------------------------------------------------------------------------------------------------------------------------------------------------------------------------------------------------------------------------------------------------------------------|-----------------------------------------------------------------------------------------------------------------------------------------------------------------------------------------------------------|---------------------------------------------------------------------------------------------------------------------------------------------------------------------------------------------|
|   |                                                     |     |                                                                                                      |                                                                                                                                                                                                                                                                                                                                                                                                                                                                                                                                                                                                                                                                                                                                                                                                                                                                                                                                                                                                 | (PPE) by clinicians and carers. Existing ACP can be difficult to interpret given unpredictable and unprecedented nature of COVID-19.                                                                                                                                                                        |                                                                                                                                                                                                           |                                                                                                                                                                                             |
| 4 | Bender M, Huang KN, Raetz J 2021 J Am Board Fam Med | USA | To describe new challenges and new opportunities for ACP that have arisen from the COVID-19 pandemic | <p>Respecting Choices <a href="https://respectingchoices.org/covid-19-resources/">https://respectingchoices.org/covid-19-resources/</a></p> <p>Information for clinicians and patients on advance care planning conversations and a decision aid for discussing CPR</p> <p>VITALtalk <a href="https://www.vitaltalk.org/guides/covid-19-communication-skills/">https://www.vitaltalk.org/guides/covid-19-communication-skills/</a></p> <p>PDFs available in multiple languages. Website and app (Apple or Android) with communication frameworks for goals of care and other often challenging conversations.</p> <p>Center to Advance Palliative Care <a href="https://www.capc.org/toolkits/covid-19-response-resources/">https://www.capc.org/toolkits/covid-19-response-resources/</a></p> <p>Ariadne Labs The Conversation Project <a href="https://theconversationproject.org/covid19/">https://theconversationproject.org/covid19/</a></p> <p>Includes the guide for patients "Being</p> | Lack of time, lack of billing codes, clinician and patient discomfort, lack of resources, difficulties with documenting, centralising and accessing ACP documents. During COVID-19; PPE, visitor restrictions and minimising exposure to infection make having and documenting ACP conversations difficult. | During COVID 19; quick and widespread uptake of telehealth, changes to Medicare billing to encourage remote consultations, telehealth facilitates substitute decision makers joining the ACP conversation | The importance of ACP is heightened during COVID-19 due to its high morbidity and mortality, potential for rapid clinical deterioration and many uncertainties associated with the illness. |



|   |                                                                                   |     |                                                                                                                                           |                                                                                                                                                                                                                                                                                                                                                                                                                                                                                                                                                                                       |                                                                                                                                                                                                                                                                                                                                                                                |  |                                                                                                                                                                                                                                                                                                                                                                                                                                  |
|---|-----------------------------------------------------------------------------------|-----|-------------------------------------------------------------------------------------------------------------------------------------------|---------------------------------------------------------------------------------------------------------------------------------------------------------------------------------------------------------------------------------------------------------------------------------------------------------------------------------------------------------------------------------------------------------------------------------------------------------------------------------------------------------------------------------------------------------------------------------------|--------------------------------------------------------------------------------------------------------------------------------------------------------------------------------------------------------------------------------------------------------------------------------------------------------------------------------------------------------------------------------|--|----------------------------------------------------------------------------------------------------------------------------------------------------------------------------------------------------------------------------------------------------------------------------------------------------------------------------------------------------------------------------------------------------------------------------------|
|   |                                                                                   |     |                                                                                                                                           | Prepared in the Time of COVID," available in English and Spanish.                                                                                                                                                                                                                                                                                                                                                                                                                                                                                                                     |                                                                                                                                                                                                                                                                                                                                                                                |  |                                                                                                                                                                                                                                                                                                                                                                                                                                  |
| 5 | Block BL, Smith AK, Sudore RL<br>2020<br>J Am Geriatr Soc                         | USA | To detail how to conduct ACP conversations and suggest mechanisms for health systems to foster ACP                                        | Provides examples of how to frame conversations.<br><br>Resources<br><a href="https://www.capc.org/toolkits/covid-19-response-resources">https://www.capc.org/toolkits/covid-19-response-resources</a><br><br><a href="https://www.vitaltalk.org/guides/covid-19-communication-skills">https://www.vitaltalk.org/guides/covid-19-communication-skills</a><br><br><a href="https://respectingchoices.org/covid-19-resources">https://respectingchoices.org/covid-19-resources</a><br><br><a href="https://www.ariadnelabs.org/coronavirus">https://www.ariadnelabs.org/coronavirus</a> | Legalised language, variations in requirements across states, low uptake in marginalised groups, clinicians feel uncomfortable discussing ACP and feel it's someone else's responsibility, physical distancing                                                                                                                                                                 |  | The article proposes how to conduct effective ACP conversations:<br>1) Involve all clinicians to help outpatient engage with ACP<br>2) Encourage a simple three-step approach to begin ACP<br>3) Health systems should leverage messaging capabilities to disseminate ACP materials<br>4) Hospitals and states should consider temporarily pausing legal requirements for ACP completion that are counter to physical distancing |
| 6 | Carr D, Boerner K, Moorman S<br>2020<br>J Aging Soc Policy                        | USA | To describe complicated bereavement in COVID-19 and argue for new models of support                                                       |                                                                                                                                                                                                                                                                                                                                                                                                                                                                                                                                                                                       |                                                                                                                                                                                                                                                                                                                                                                                |  | COVID-19 is resulting in poor quality deaths - people are dying alone in hospital, suffering discomfort and difficulty breathing. Families can experience complicated grief as a result, including guilt, anger and distress. To reduce survivor grief, the quality of death in COVID-19 must be improved, and ACP is one way to ensure patients receive the care they desire.                                                   |
| 7 | Cavalier JS, Maguire JM, Kamal AH<br>2020<br>Journal of Pain & Symptom Management | USA | To advocate for two-tiered ACP during the pandemic to address general and COVID-19-specific assessments of patient preferences and values | Provides ACP directed text of phrases and questions for common complications of COVID-19 (respiratory, renal, stroke, lack of visitation, post-intensive care syndrome and death)                                                                                                                                                                                                                                                                                                                                                                                                     | COVID-19 is resulting in poor quality deaths - people are dying alone in hospital, suffering discomfort and difficulty breathing. Families can experience complicated grief as a result, including guilt, anger and distress. To reduce survivor grief, the quality of death in COVID-19 must be improved, and ACP is one way to ensure patients receive the care they desire. |  | This article argues that preferences for mechanical ventilation, tracheostomy, percutaneous feeding, haemodialysis, and post-acute recovery issues should be explicitly addressed in ACP, because common complications of COVID-19 often require these aggressive treatments.                                                                                                                                                    |

|    |                                                            |        |                                                                                                |                                                                                                  |                                                                                                                                                                                                                                                                                                                                                                                                                                                                                                                                                                                |                                                                                                                                                                                                                                                                                                                                                           |                                                                                                                                                                                                                                                                                                                                                                                                                  |
|----|------------------------------------------------------------|--------|------------------------------------------------------------------------------------------------|--------------------------------------------------------------------------------------------------|--------------------------------------------------------------------------------------------------------------------------------------------------------------------------------------------------------------------------------------------------------------------------------------------------------------------------------------------------------------------------------------------------------------------------------------------------------------------------------------------------------------------------------------------------------------------------------|-----------------------------------------------------------------------------------------------------------------------------------------------------------------------------------------------------------------------------------------------------------------------------------------------------------------------------------------------------------|------------------------------------------------------------------------------------------------------------------------------------------------------------------------------------------------------------------------------------------------------------------------------------------------------------------------------------------------------------------------------------------------------------------|
| 8  | Chan HY<br>2020<br>Eur J Health Law                        | Europe | To explore how the pandemic affects advance care planning through the lenses of law and ethics |                                                                                                  | Ethnic minorities mistrust the healthcare system and are less likely to engage in ACP, clinicians lack cultural understanding of death and dying, accessing documented ACP is complicated, not centralised and lacks adequate infrastructure. During COVID-19; fear of compromised care in setting of resource scarcity, rapid deterioration does not allow time for full ACP discussions, family disagreement about ACP exacerbated by visitor restrictions, reduced support systems and social distancing leads to reduced access to clinicians and lawyers to finalise ACP. | During COVID-19; telehealth supports patients and families during end of life care, facilitates virtual farewells for patients who would otherwise die alone, as well as accelerated development of telehealth services. The pandemic has changed the urgency of ACP - people faced with mortality are realising importance of preparing for future care. |                                                                                                                                                                                                                                                                                                                                                                                                                  |
| 9  | Curtis JR, Kross EK, Stapleton RD<br>2020<br>Jama          | USA    | To describe the importance of ACP prior to onset of serious acute illness                      | Provides a Proposed Components of Informed Assent Framework diagram outlining steps and sequence |                                                                                                                                                                                                                                                                                                                                                                                                                                                                                                                                                                                |                                                                                                                                                                                                                                                                                                                                                           | ACP during COVID-19 should be a high priority for 3 reasons;<br>1) clinicians should strive to avoid intensive life-sustaining treatments when unwanted by patients<br>2) avoiding unwanted high-intensity treatment becomes especially important when health care capacity is stretched<br>3) provision of unwanted high-intensity treatment puts patients, families and clinician at high risk of transmission |
| 10 | Dattolo PC, Toccafondi A, Somma C<br>2021<br>J Palliat Med | Italy  | To describe the Italian experience of ACP during the COVID-19 pandemic                         |                                                                                                  |                                                                                                                                                                                                                                                                                                                                                                                                                                                                                                                                                                                | COVID-19 provides an opportunity to introduce ACP in countries where it was not widespread. Policy and legislation changes force ACP into routine clinical practice. Telehealth facilitates ACP and overcomes                                                                                                                                             | Prior to COVID-19, only 1.1% of the Italian population had completed advanced directives.                                                                                                                                                                                                                                                                                                                        |

|    |                                                              |     |                                                                                                                            |                                                                                                                                                                                                                                                                                                                                                                                                                                                                                                                                                                                                                                                                                                                                                                                                                                                                                                                                                                                                                                             |  |                                                                                                                                                                                                                        |                                                                                                                                                                                                                                                                                                                                                                                                                                                                                                                                                                                                                                                                                                                                                                                                                                                                                                                                              |
|----|--------------------------------------------------------------|-----|----------------------------------------------------------------------------------------------------------------------------|---------------------------------------------------------------------------------------------------------------------------------------------------------------------------------------------------------------------------------------------------------------------------------------------------------------------------------------------------------------------------------------------------------------------------------------------------------------------------------------------------------------------------------------------------------------------------------------------------------------------------------------------------------------------------------------------------------------------------------------------------------------------------------------------------------------------------------------------------------------------------------------------------------------------------------------------------------------------------------------------------------------------------------------------|--|------------------------------------------------------------------------------------------------------------------------------------------------------------------------------------------------------------------------|----------------------------------------------------------------------------------------------------------------------------------------------------------------------------------------------------------------------------------------------------------------------------------------------------------------------------------------------------------------------------------------------------------------------------------------------------------------------------------------------------------------------------------------------------------------------------------------------------------------------------------------------------------------------------------------------------------------------------------------------------------------------------------------------------------------------------------------------------------------------------------------------------------------------------------------------|
|    |                                                              |     |                                                                                                                            |                                                                                                                                                                                                                                                                                                                                                                                                                                                                                                                                                                                                                                                                                                                                                                                                                                                                                                                                                                                                                                             |  | the need for social distancing and visitor restrictions.                                                                                                                                                               |                                                                                                                                                                                                                                                                                                                                                                                                                                                                                                                                                                                                                                                                                                                                                                                                                                                                                                                                              |
| 11 | DeFilippis EM, Ranard LS, Berg DD<br>2020<br>Circulation     | USA | To describe the impact of COVID-19 on cardiology trainees                                                                  |                                                                                                                                                                                                                                                                                                                                                                                                                                                                                                                                                                                                                                                                                                                                                                                                                                                                                                                                                                                                                                             |  |                                                                                                                                                                                                                        | Cardiopulmonary resuscitation (CPR) in a patient with COVID-19 can be dangerous for HCW. ACP is crucial to identifying patients' treatment preferences including CPR. Ideally ACP should occur when a person is well at home and with a HCW well-known to them. Palliative care telehealth services can assist frontline HCW to revisit and confirm ACP in the ED.                                                                                                                                                                                                                                                                                                                                                                                                                                                                                                                                                                           |
| 12 | Desai AS, Kamdar BB, Mehra MR<br>2020<br>Prog Cardiovasc Dis | USA | To outline key palliative care needs exposed by COVID-19 and provide resources that may be useful to front-line clinicians | <p>Headspace - <a href="https://www.headspace.com">https://www.headspace.com</a> (free to many providers)</p> <p>10% happier – <a href="https://www.tenpercent.com">https://www.tenpercent.com</a> (free to healthcare providers)</p> <p>UCLA mindfulness program - <a href="https://www.uclahealth.org/marc/mindful-meditations">https://www.uclahealth.org/marc/mindful-meditations</a></p> <p>Online cognitive behavioral therapy Evermind - <a href="https://evermind.health">https://evermind.health</a></p> <p>•Sanvello – <a href="https://www.sanvello.com">https://www.sanvello.com</a> (free access during COVID-19)</p> <p>Symptom management guidance</p> <p>Treatment protocols - <a href="https://covidprotocols.org/protocols/15-palliative-care/">https://covidprotocols.org/protocols/15-palliative-care/</a></p> <p>Advance care planning assistance</p> <p>•Vital TALK - <a href="https://www.vitaltalk.org/guides/covid-19-communication-skills">https://www.vitaltalk.org/guides/covid-19-communication-skills</a></p> |  | ACP training and conversation guides to assist front-line HCW can improve clinician confidence. Incorporating non-medical HCW in the ACP team can share the burden of work, especially when resources are constrained. | <p>Proactive ACP when patients can make their own decisions can ease the burden on carers.</p> <p>Challenges of COVID-19;</p> <ol style="list-style-type: none"> <li>1. Psychological impact on patients and clinicians - feelings of fear, anxiety, and helplessness. Stress compounded by prolonged quarantine, social isolation and financial burden. Thorough psychosocial assessment of all COVID-19 patients is warranted, and multi-disciplinary team (MDT) approach necessary for patients at high-risk</li> <li>2. Symptom management, especially dyspnoea and respiratory distress.</li> <li>3. ACP - COVID-19 can result in protracted ICU admissions and medical treatment futility making proactive ACP important.</li> <li>4. Support for HCW - self-care must be emphasised, and crisis support available, as well as avoiding prolonged work hours, providing temporary housing and access to healthy diversions.</li> </ol> |

|    |                                                             |        |                                                                                                              |                                                                                                                                                                                                                                                                                                                                                                                                                                                    |                                                                                                                                                                                                                                                                                                                                                                                                              |                                                                                                                         |                                                                                                                                                                                                                                                                                                                                                                                                                                                                                                                                                                                                                                                                                                                                   |
|----|-------------------------------------------------------------|--------|--------------------------------------------------------------------------------------------------------------|----------------------------------------------------------------------------------------------------------------------------------------------------------------------------------------------------------------------------------------------------------------------------------------------------------------------------------------------------------------------------------------------------------------------------------------------------|--------------------------------------------------------------------------------------------------------------------------------------------------------------------------------------------------------------------------------------------------------------------------------------------------------------------------------------------------------------------------------------------------------------|-------------------------------------------------------------------------------------------------------------------------|-----------------------------------------------------------------------------------------------------------------------------------------------------------------------------------------------------------------------------------------------------------------------------------------------------------------------------------------------------------------------------------------------------------------------------------------------------------------------------------------------------------------------------------------------------------------------------------------------------------------------------------------------------------------------------------------------------------------------------------|
| 13 | Essomba MJN, Ciaffi L, Etoundi PO, et al 2020 Pan Afr Med J | Africa | To describe the extent and challenges of palliative care in sub-Saharan Africa                               |                                                                                                                                                                                                                                                                                                                                                                                                                                                    | Culturally not accepted to talk about end-of-life care and death. Many countries in sub-Saharan Africa (SSA) do not recognise ACP. Families and patients expect life-preservation by all means. The rapid evolution of COVID-19 makes prognostication and preparation for death difficult. Stigma around COVID-19 and visitor restrictions also limit ACP. No ACP or palliative care training of HCW in SSA. |                                                                                                                         | Many SSA countries do not have well-established palliative care programs. Many patients with severe COVID-19 will suffer and die at home without palliative care support. Geriatric medicine remains in its infancy in SSA and the integration of discussions about life-support is not standard among elderly patients. Talking about end-of-life care and death is taboo in SSA.                                                                                                                                                                                                                                                                                                                                                |
| 14 | Fausto J, Hirano L, Lam D, et al 2020 J Pain Symptom Manage | USA    | To describe the development of the palliative care response to COVID-19 pandemic in Seattle, USA             | <p>1. Provides strategy for palliative Care Consult Service Interactions with the ED during conventional, contingency, and crisis capacity</p> <p>2. Strategy for Palliative Care consult service interactions with the ICUs during conventional, contingency, and crisis capacity</p> <p>3. Strategy for Palliative Care consult service interactions With the Medical/Surgical Acute Care for conventional, contingency, and crisis capacity</p> |                                                                                                                                                                                                                                                                                                                                                                                                              |                                                                                                                         | The strategy used a framework centred on conventional care, contingency care and crisis care to plan a palliative care response to COVID-19. The primary areas of need were identified as addressing goals of care, code status, symptom management and supporting families affected by visitor restrictions. Particular considerations included a focus on early goals of care and code status discussions, especially with older patients with co-morbidities. The aim being to avoid unwanted or non-beneficial CPR or intubation in the context of constrained resources. Palliative care specialists provided guidance, resources and communication tools to support other clinicians discussing ACP with COVID-19 patients. |
| 15 | Galbadage T, Peterson BM, Wang DC, et al 2020 Front Psychol | USA    | To discuss the importance of the biopsychosocial spiritual model in end-of-life care and its implications on |                                                                                                                                                                                                                                                                                                                                                                                                                                                    | Travel and visitor restrictions and social isolation during COVID-19 reduces opportunities for shared-decision making. Uncertainties around the disease, lack of time                                                                                                                                                                                                                                        | Inclusion of palliative care teams can facilitate ACP remotely. Early ACP during the hospital admission is important in | Challenges to the provision of holistic patient care during COVID-19 are similar to those experienced during the 2003 Severe Acute Respiratory Syndrome (SARS) outbreak, and include patient isolation, quarantine of contacts, restricted contact with family members and limitation of contact with the deceased body, restricting death rituals and funeral rites.                                                                                                                                                                                                                                                                                                                                                             |

|    |                                                                                        |     |                                                                                                                               |                                                                                                                                                                                                                                                                                                                                                                                                            |                                                                                                                                                                                                                                                                                                                           |                                                                                                                                                                                          |                                                                                                                                                                                                                                                                                                                                                                                                                                                                     |
|----|----------------------------------------------------------------------------------------|-----|-------------------------------------------------------------------------------------------------------------------------------|------------------------------------------------------------------------------------------------------------------------------------------------------------------------------------------------------------------------------------------------------------------------------------------------------------------------------------------------------------------------------------------------------------|---------------------------------------------------------------------------------------------------------------------------------------------------------------------------------------------------------------------------------------------------------------------------------------------------------------------------|------------------------------------------------------------------------------------------------------------------------------------------------------------------------------------------|---------------------------------------------------------------------------------------------------------------------------------------------------------------------------------------------------------------------------------------------------------------------------------------------------------------------------------------------------------------------------------------------------------------------------------------------------------------------|
|    |                                                                                        |     | patients dying with COVID-19                                                                                                  |                                                                                                                                                                                                                                                                                                                                                                                                            | and lack of resources also limit ACP.                                                                                                                                                                                                                                                                                     | preparing patients and setting realistic expectations of disease course. Video-conferencing can facilitate virtual connectedness and overcome physical distance and visitor restrictions |                                                                                                                                                                                                                                                                                                                                                                                                                                                                     |
| 16 | Gaur S, Pandya N, Dumyati G, Nace DA, Pandya K, Jump RLP<br>2020<br>J Am Med Dir Assoc | USA | To describe a COVID-19 communication and care planning tool                                                                   | The authors developed a COVID-19 Communication and Care Planning Tool to provide a structured approach to ACP conversations with nursing home residents and their families regarding COVID-19 infection and expected outcomes. It is based on mnemonic COVID and includes;<br>1. Course of Illness<br>2. Outcomes in older adults<br>3. provisions we have made<br>4. Informed consent<br>5. Documentation |                                                                                                                                                                                                                                                                                                                           |                                                                                                                                                                                          | The authors developed a COVID-19 Communication and Care Planning Tool to provide a structured approach to ACP conversations with nursing home residents and their families regarding COVID-19 infection and expected outcomes. It is based on mnemonic COVID and includes;<br>1. Course of Illness<br>2. Outcomes in older adults<br>3. provisions we have made<br>4. Informed consent<br>5. Documentation                                                          |
| 17 | Gordon AL, Goodman C, Achterberg W, et al<br>2020<br>Age Ageing                        | UK  | To provide a commentary on challenges and dilemmas identified in the response to COVID-19 for care homes and their residents. |                                                                                                                                                                                                                                                                                                                                                                                                            | Isolation of residents in their rooms limits visitor restrictions and face-to-face ACP discussions. Attempts at blanket ACP to all nursing home residents has created negative perceptions about ACP among the wider community. Nursing and medical staff fatigue, both physical and emotional, also limits effective ACP |                                                                                                                                                                                          | Challenges of COVID-19 experienced in the nursing home sector include:<br>1. Psychological impact on staff and residents, due to high mortality experienced by residents.<br>2. Difficulty caring for residents isolated in their rooms, with higher rates of cognitive impairment, immobility and falls among residents, and lower staff to resident ratios.<br>3. High rates of asymptomatic COVID-19 cases and difficulty limiting transmission among residents. |

|    |                                                                                   |           |                                                                                                                            |                                                                                                                                                                                                                                                                                                                                                   |                                                                                                                                      |                                             |                                                                                                                                                                                                                                                                                                                                                                                                                                                                                                                                                                                                                                                                                                                                                                                                                                                                                                  |
|----|-----------------------------------------------------------------------------------|-----------|----------------------------------------------------------------------------------------------------------------------------|---------------------------------------------------------------------------------------------------------------------------------------------------------------------------------------------------------------------------------------------------------------------------------------------------------------------------------------------------|--------------------------------------------------------------------------------------------------------------------------------------|---------------------------------------------|--------------------------------------------------------------------------------------------------------------------------------------------------------------------------------------------------------------------------------------------------------------------------------------------------------------------------------------------------------------------------------------------------------------------------------------------------------------------------------------------------------------------------------------------------------------------------------------------------------------------------------------------------------------------------------------------------------------------------------------------------------------------------------------------------------------------------------------------------------------------------------------------------|
| 18 | Heyland DK<br>2020<br>Healthcare                                                  | Canada    | To advocate for a move towards ASIPP to prepare people for future clinical decision-making                                 | Table: Reasons Advance Directives or Living Wills Are Not Useful (suggests ASIPP)<br><br>Provides a Values– Preferences Grid Process for Advanced serious illness Preparation and Planning diagram<br><br>Resources<br><a href="http://www.myicuguide.ca">www.myicuguide.ca</a><br><a href="http://www.planwelguide.com">www.planwelguide.com</a> |                                                                                                                                      |                                             | The article argues advance directives are not useful because:<br>1. They have no situational validity<br>2. A person cannot be fully informed about treatment options, risks and benefits as required by law<br>3. The language is vague and non-specific<br>4. Decisions made in advance of time are unreliable<br>5. Incapable patients cannot revoke their decisions<br>Planning for death under conditions of certainty (e.g. advanced cancer) is not the same as planning for serious illness in conditions of uncertainty (e.g. COVID-19 pneumonia). The author proposes a move towards ASIPP where patients are asked about their values in a way that highlights the trade-off with competing values                                                                                                                                                                                     |
| 19 | Ho EP, Neo H-Y<br>2021<br>Age Ageing                                              | Singapore | To advocate for ACP discussions with patients over score-based triage when considering ICU admission for COVID-19 patients | Diagram with points for discussion with patients prior to applying triage scores. The POWER tool to facilitate ceiling-of-care discussion                                                                                                                                                                                                         | During COVID-19; Protective personal equipment (PPE), face masks, restricted visiting policies, lack of time for lengthy discussions | Increased utilisation of video-conferencing | During COVID-19; ACP prevents medically inappropriate treatments, reduces risk of contagion to HCW, streamlines ICU resources towards patients who want and will benefit from intensive care.<br>The article argues;<br>- During the COVID-19 pandemic, overwhelmed healthcare systems use triage scores to ration scarce critical care resources.<br>- Before applying score-based triage, physicians should discern if the older adult will benefit and also want critical care.<br>- Discussions to convey clinical information and discern the older person's therapeutic goals are important.<br>- Conversations aimed at achieving goal-concordant care must become a new clinical norm.<br>- Leaving treatment escalation decisions until a time of crisis deprives patients of an informed choice and risks family members demanding over-aggressive treatment in the heat of the moment |
| 20 | Hopkins SA, Lovick R, Polak L, Bowers B, Morgan T, Kelly MP, et al<br>2020<br>BMJ | UK        | To argue that the benefits of ACP are derived from the process, not the plans it produces                                  | Coronavirus Disease 2019 (COVID-19) Shared Decision-Making Tool. National Hospice and Palliative Care Organisation. 19 March 2020. Available from: <a href="https://www.nhpco.org/wp-content/uploads/COVID-19-Shared-Decision-Making-Tool.pdf">https://www.nhpco.org/wp-content/uploads/COVID-19-Shared-Decision-Making-Tool.pdf</a>              | During COVID-19; social distancing, remote consultations                                                                             |                                             | ACP creates strengthened relationships between patient, family and clinicians, support during the experience of dying & bereavement and COVID-19 provides the "trigger" to initiate conversations around ACP. The benefits of ACP derive more from its process than from the plans it produces. An overemphasis on achieving individual choice may paradoxically undermine good care.                                                                                                                                                                                                                                                                                                                                                                                                                                                                                                            |
| 21 | Hughes MC, Vernon E                                                               | USA       | To offer strategies that                                                                                                   | Coronavirus Disease 2019 (COVID-19)                                                                                                                                                                                                                                                                                                               | Racial and ethnic minorities have a lack of                                                                                          | HCW and social workers share                | Utilisation of hospice care is historically lower among racial and ethnic minorities, however COVID-19 has caused high hospitalisation and mortality in this group. The                                                                                                                                                                                                                                                                                                                                                                                                                                                                                                                                                                                                                                                                                                                          |

|                                |  |  |                                                                         |                                                                                                                                                                                                                                                                                                                                                                                                                                                                                                                                                                                                                                                                                                                                                                                                                                                                                      |                                                                                                                                             |                                                                                                                                                                                                                                                                                              |                                                                                                       |
|--------------------------------|--|--|-------------------------------------------------------------------------|--------------------------------------------------------------------------------------------------------------------------------------------------------------------------------------------------------------------------------------------------------------------------------------------------------------------------------------------------------------------------------------------------------------------------------------------------------------------------------------------------------------------------------------------------------------------------------------------------------------------------------------------------------------------------------------------------------------------------------------------------------------------------------------------------------------------------------------------------------------------------------------|---------------------------------------------------------------------------------------------------------------------------------------------|----------------------------------------------------------------------------------------------------------------------------------------------------------------------------------------------------------------------------------------------------------------------------------------------|-------------------------------------------------------------------------------------------------------|
| 2021<br>J Gerontol Soc<br>Work |  |  | may lead to greater hospice utilisation by racial and ethnic minorities | <p>Shared Decision-Making Tool (National Hospice and Palliative Care Organization, 2020) Available at <a href="file:///C:/Users/will.0503/AppData/Local/Downloads/COVID-19-Shared-Decision-Making-Tool.pdf">file:///C:/Users/will.0503/AppData/Local/Downloads/COVID-19-Shared-Decision-Making-Tool.pdf</a></p> <p>Starting the Conversation (Hospice Foundation of America, 2020) Available at <a href="https://hospicefoundation.org/Hospice-Care/Starting-the-Conversation">https://hospicefoundation.org/Hospice-Care/Starting-the-Conversation</a></p> <p>Advance Directives – Multiple Languages (U.S. National Library of Medicine, 2020) Available at <a href="https://medlineplus.gov/languages/advance-directives.html">https://medlineplus.gov/languages/advance-directives.html</a></p> <p>COVID-19 Telehealth Resources (National Consortium of Telehealth Resource</p> | trust of medical institutions and poor health literacy. Devices needed for telehealth are less available among racial and ethnic minorities | ACP information in various languages. Religious and spiritual leaders can provide guidance to ethnic minorities and encourage community engagement with ACP. Developing relationships with community and religious groups build trust and provides opportunities to start ACP conversations. | pandemic provides an opportunity to strength community relations and understanding about hospice care |
|--------------------------------|--|--|-------------------------------------------------------------------------|--------------------------------------------------------------------------------------------------------------------------------------------------------------------------------------------------------------------------------------------------------------------------------------------------------------------------------------------------------------------------------------------------------------------------------------------------------------------------------------------------------------------------------------------------------------------------------------------------------------------------------------------------------------------------------------------------------------------------------------------------------------------------------------------------------------------------------------------------------------------------------------|---------------------------------------------------------------------------------------------------------------------------------------------|----------------------------------------------------------------------------------------------------------------------------------------------------------------------------------------------------------------------------------------------------------------------------------------------|-------------------------------------------------------------------------------------------------------|

|    |                                                                         |     |                                                                                                   |                                                                                                                                                 |                                                                                                                                                                                                                                                                                                                                                                                 |                                                                                                                                                                                                                                                                                                                                              |                                                                                                                                                                                                                                                                                                                                           |
|----|-------------------------------------------------------------------------|-----|---------------------------------------------------------------------------------------------------|-------------------------------------------------------------------------------------------------------------------------------------------------|---------------------------------------------------------------------------------------------------------------------------------------------------------------------------------------------------------------------------------------------------------------------------------------------------------------------------------------------------------------------------------|----------------------------------------------------------------------------------------------------------------------------------------------------------------------------------------------------------------------------------------------------------------------------------------------------------------------------------------------|-------------------------------------------------------------------------------------------------------------------------------------------------------------------------------------------------------------------------------------------------------------------------------------------------------------------------------------------|
|    |                                                                         |     |                                                                                                   | Centers, 2020)<br>Available at<br><a href="https://telehealthresourcecenter.org/resources/">https://telehealthresourcecenter.org/resources/</a> |                                                                                                                                                                                                                                                                                                                                                                                 |                                                                                                                                                                                                                                                                                                                                              |                                                                                                                                                                                                                                                                                                                                           |
| 22 | Iacobucci G<br>2020<br>Bmj                                              | UK  | To advocate that ACP in COVID-19 needs to be individualised and have informed consent             |                                                                                                                                                 |                                                                                                                                                                                                                                                                                                                                                                                 |                                                                                                                                                                                                                                                                                                                                              | The article addresses reports that general practitioners felt under pressure to not hospitalise older vulnerable patients with COVID-19. A statement from the Royal College of Physicians (UK) says that ACP should be individualised and made with the patient's full consent, reflecting one's circumstances and treatment preferences. |
| 23 | Janwadkar AS,<br>Bibler TM<br>2020<br>Am J Bioeth                       | USA | To describe the ethical challenges of ACP during COVID-19                                         |                                                                                                                                                 | ACP discussions often had long in advance of their need, and patient preferences change over time. In the setting of resource scarcity, ACP can be interpreted as physician abandonment. Time constraints on HCW can limit the quality and quantity of ACP conversations. PPE and social distancing inhibits body language and limits rapport building between patient and HCW. | During COVID-19, ACP is happening in a timely manner and feels more pressing to the public. It is changing those who are interested in ACP - now younger people with common comorbidities (e.g. asthma) are engaging in ACP. Early palliative care involvement and proactive ACP can prevent psychological trauma for patients and families. |                                                                                                                                                                                                                                                                                                                                           |
| 24 | Kluger BM,<br>Vaughan CL,<br>Robinson MT,<br>et al<br>2020<br>Neurology | USA | To identify scenarios where a neuro-palliative approach may be beneficial in the COVID-19 context |                                                                                                                                                 |                                                                                                                                                                                                                                                                                                                                                                                 | For people living with neurological disease, COVID-19 provides an opportunity to discuss ACP                                                                                                                                                                                                                                                 |                                                                                                                                                                                                                                                                                                                                           |



|    |                                                                                    |     |                                                                                                        |  |                                                                                                                                                                                                                                                                                                                                                                                                                                                                      |                                                                                                                               |                                                                                                                                                                                                                                                                                                                                                                                                                                                                                                                                                                                                                                                                                                                                                                                                                                                                              |
|----|------------------------------------------------------------------------------------|-----|--------------------------------------------------------------------------------------------------------|--|----------------------------------------------------------------------------------------------------------------------------------------------------------------------------------------------------------------------------------------------------------------------------------------------------------------------------------------------------------------------------------------------------------------------------------------------------------------------|-------------------------------------------------------------------------------------------------------------------------------|------------------------------------------------------------------------------------------------------------------------------------------------------------------------------------------------------------------------------------------------------------------------------------------------------------------------------------------------------------------------------------------------------------------------------------------------------------------------------------------------------------------------------------------------------------------------------------------------------------------------------------------------------------------------------------------------------------------------------------------------------------------------------------------------------------------------------------------------------------------------------|
| 25 | McAfee CA, Jordan TR, Cegelka D, et al<br>2020<br>Death Stud                       | USA | To describe four broad action steps that would likely increase the rates of ACP completion in the U.S. |  | Barriers to ACP completion for minority populations include institutional racism, lack of access to or infrequent utilization of care services, lack of knowledge, lack of awareness, low health literacy, and lower accessibility to advance directives                                                                                                                                                                                                             | Media attention of COVID-19 hospitalisations and deaths has focused the public's urgent attention on ACP                      | ACP ensures that patients' wishes are established, documented, and followed. It improves quality of life at end-of-life and increases the proportion of patients who die at home under hospice care. It allows patients to make collaborative health care decisions with their doctors and families. It gives patients a sense of control, reduces futile medical treatment and excess burden on carers, it helps to prevent unnecessary prolongation of the dying process, and reduces levels of emotional distress for family members.<br>The article recommends four actions to increase death education and ACP completion:<br>(1) integrate death education into teacher preparation programs<br>(2) incorporate death education in undergraduate curricula<br>(3) provide better education in death and dying to future health professionals<br>(4) educate the public |
| 26 | Moore KJ, Sampson EL, Kupeli N, Davies N<br>2020<br>International Psychogeriatrics | UK  | To highlight the importance of ACP during COVID-19                                                     |  | During COVID-19; there remains a lack of trust in clinician decisions, lack of time for families to process information and make informed decisions, clinicians do not have time or emotional capacity to develop relationships or trust with patients, over-reliance on telephone communication hinders the clinician's ability to read non-verbal cues and facilitate sensitive conversations, some people do not have access or skills to use video-conferencing. | During COVID-19; realisation that death is imminent and difficulty anticipating the future forces older people to address ACP | ACP offers an opportunity for older persons to express preferences for end-of-life care and nominate substitute decision-maker, increases confidence and reduces guilt of substitute decision makers.<br>COVID is changing how people die - there is sudden clinical deterioration, forcing patients and families to make quick decisions under stressful circumstances. Many are dying alone.                                                                                                                                                                                                                                                                                                                                                                                                                                                                               |
| 27 | Moorman S, Boerner K, Carr D<br>2020<br>J Aging Soc Policy                         | USA | To examine ACP in the infectious diseases context that is the COVID-19 pandemic                        |  | Loneliness and social isolation hinder ACP because isolated people lack a readily accessible person to assist them. The social distancing and self-quarantining necessary during COVID-19 has increased social isolation further. Family conflict can limit ACP, exacerbated by psychosocial and economic stressors of the pandemic. The rapid clinical decline experienced with                                                                                     | Supportive family relationships promote ACP                                                                                   |                                                                                                                                                                                                                                                                                                                                                                                                                                                                                                                                                                                                                                                                                                                                                                                                                                                                              |

|    |                                                                                                       |     |                                                                                                             |                                                                                                                                                                                                                                                                                                                                                   |                                                                                                                                                                                                                                                 |                                                                                                                                  |                                                                                                                                                                                                                                                                                                                                                                                                                                             |
|----|-------------------------------------------------------------------------------------------------------|-----|-------------------------------------------------------------------------------------------------------------|---------------------------------------------------------------------------------------------------------------------------------------------------------------------------------------------------------------------------------------------------------------------------------------------------------------------------------------------------|-------------------------------------------------------------------------------------------------------------------------------------------------------------------------------------------------------------------------------------------------|----------------------------------------------------------------------------------------------------------------------------------|---------------------------------------------------------------------------------------------------------------------------------------------------------------------------------------------------------------------------------------------------------------------------------------------------------------------------------------------------------------------------------------------------------------------------------------------|
|    |                                                                                                       |     |                                                                                                             |                                                                                                                                                                                                                                                                                                                                                   | COVID-19 can prevent ACP entirely. Current ACP tools are targeted towards non-communicable chronic illnesses and do not match the COVID-19 experience                                                                                           |                                                                                                                                  |                                                                                                                                                                                                                                                                                                                                                                                                                                             |
| 28 | Morrow-Howell N, Galucia N, Swinford E 2020 J Aging Soc Policy                                        | USA | To identify and discuss challenges and opportunities arising from the COVID-19 pandemic                     |                                                                                                                                                                                                                                                                                                                                                   |                                                                                                                                                                                                                                                 |                                                                                                                                  | During COVID-19, there is increased awareness about the importance of advance directives and other legal documents. During the pandemic, requests for common ACP tools have increased greatly. There has been a focus on development of end-of-life planning resources specific to COVID-19 and there is a better understanding of the importance of communicating ACP preferences and decisions.                                           |
| 29 | Paladino J, Mitchell S, Mohta N, Lakin JR, Downey N, Fromme EK, et al 2021 Jt Comm J Qual Patient Saf | USA | To describe the development of a COVID-19 specific communication tool to facilitate ACP                     | Provides process for tool development<br>Provides conversation guide with outpatients<br>Provides conversation guide with inpatients.<br>Describes tool designed<br>COVID-19 Outpatient and Inpatient Conversation Guides Incorporate High-Quality Communication Techniques<br>Implementation Guidance for Outpatient and Inpatient Conversations | ACP during COVID-19 is complicated by patients being separated from family and visitors, conversations occurring online or over the phone, clinician fatigue and fear for their own safety and amplification of existing systemic inequalities. |                                                                                                                                  | ACP improves patient well-being, experience, and quality of care by aligning care with what matters most to patients and avoiding burdensome and unwanted treatments at the end of life.<br>An evidence-based communication tool, The Serious Illness Conversation Guide, has been adapted to address COVID-related ACP challenges.<br>The article includes outpatient and inpatient conversation guides to facilitate ACP during COVID-19. |
| 30 | Powell VD, Silveira MJ 2021 J Aging Soc Policy                                                        | USA | To describe the role of palliative care specialists in caring for multi-morbid older adults during COVID-19 | <a href="https://getpalliativecare.org/provider-directory">https://getpalliativecare.org/provider-directory</a>                                                                                                                                                                                                                                   |                                                                                                                                                                                                                                                 | Palliative care teams can assist in the care of people with multimorbidity during the COVID-19 pandemic. They can facilitate ACP |                                                                                                                                                                                                                                                                                                                                                                                                                                             |

|    |                                                          |           |                                                                                                              |                                                                                                                    |                                                                                                                                                                                                                                                                                                                                                                                                                                                                                 |                                                                                                                                                  |                                                                                                                                                                                                                                                                                                                                                                                                                                                                                                                                                                                    |
|----|----------------------------------------------------------|-----------|--------------------------------------------------------------------------------------------------------------|--------------------------------------------------------------------------------------------------------------------|---------------------------------------------------------------------------------------------------------------------------------------------------------------------------------------------------------------------------------------------------------------------------------------------------------------------------------------------------------------------------------------------------------------------------------------------------------------------------------|--------------------------------------------------------------------------------------------------------------------------------------------------|------------------------------------------------------------------------------------------------------------------------------------------------------------------------------------------------------------------------------------------------------------------------------------------------------------------------------------------------------------------------------------------------------------------------------------------------------------------------------------------------------------------------------------------------------------------------------------|
|    |                                                          |           |                                                                                                              |                                                                                                                    |                                                                                                                                                                                                                                                                                                                                                                                                                                                                                 | discussions and assist in the identification of surrogate decision makers. They are skilled at complex symptom management and supporting carers. |                                                                                                                                                                                                                                                                                                                                                                                                                                                                                                                                                                                    |
| 31 | Prost SG, Novisky MA, Rorvig L, et al 2021 Gerontologist | USA       | To outline how gerontologists are well suited to providing medical care in the prison system during COVID-19 |                                                                                                                    | ACP in the incarcerated population is complex and must deal with emotions including grief over losses specific to incarceration, a future without freedom, separation from loved ones, loss of decision-making powers, and threats to feelings of safety and control. HCW in the prison system have insufficient knowledge and skills to conduct ACP                                                                                                                            | Gerontologists can promote ACP in the prison system by training and empowering prison HCW to engage in ACP with older inmates.                   | The rapid spread of COVID-19 in prisons is particularly dangerous due to the disproportionately high rates of chronic medical conditions among all incarcerated persons and especially among older adults. Social distancing is impossible in the prison system, making them ideal places for COVID-19 transmission.                                                                                                                                                                                                                                                               |
| 32 | Rafty C, Lewis E, Cardona M 2020 Gerontology             | Australia | To highlight barriers and enablers to ACP discussions and propose nurse and allied health-led ACP            | Table on Current barriers and opportunities for non-medical staff engagement in initiating end-of-life discussions | Barriers to doctor-led ACP; prognostic uncertainty, time constraints, resource scarcity, doctor fatigue, burnout and isolation, limited access to psychosocial support following ACP conversations. Barriers to non-medical staff-led ACP; social expectation that doctors lead conversations about prognostication and treatment options, inadequate training, lack of professional support to include ACP in their scope of practice, discomfort about uncertainty around end |                                                                                                                                                  | The article proposes increasing nurse and allied health-led ACP discussions during COVID-19. Delegating responsibility for ACP to clinicians other than doctors can address the challenges of ACP during COVID-19.<br>Non-medical staff engagement in ACP can be encouraged by:<br>1) training courses on ACP and bad news communication<br>2) updated policies to expand scope of practice for non-medical clinicians to conduct ACP<br>3) updated legislation to protect non-medical clinicians when delivering ACP<br>4) public campaigns to increase awareness and support ACP |

|    |                                                                                         |     |                                                                                                                            |                                                                                                                                                                                                                                                                                                                                                                                                                                                                                                                                                                                                                                                                                          |                                                        |                                                     |                                                                                                                                                                                                                                                                                                                                                  |
|----|-----------------------------------------------------------------------------------------|-----|----------------------------------------------------------------------------------------------------------------------------|------------------------------------------------------------------------------------------------------------------------------------------------------------------------------------------------------------------------------------------------------------------------------------------------------------------------------------------------------------------------------------------------------------------------------------------------------------------------------------------------------------------------------------------------------------------------------------------------------------------------------------------------------------------------------------------|--------------------------------------------------------|-----------------------------------------------------|--------------------------------------------------------------------------------------------------------------------------------------------------------------------------------------------------------------------------------------------------------------------------------------------------------------------------------------------------|
|    |                                                                                         |     |                                                                                                                            |                                                                                                                                                                                                                                                                                                                                                                                                                                                                                                                                                                                                                                                                                          | of life care and potential legal action from families. |                                                     |                                                                                                                                                                                                                                                                                                                                                  |
| 33 | Reja M, Naik J, Parikh P<br>2020<br>West J Emerg Med                                    | USA | To outline pressing palliative care needs from a critical care and emergency medicine standpoint in the COVID-19 context   |                                                                                                                                                                                                                                                                                                                                                                                                                                                                                                                                                                                                                                                                                          |                                                        | Telehealth is facilitating ACP in the COVID-19 era. | Studies shows that older adults have a greater risk of mortality from COVID-19, contributed to by pre-existing cardiovascular and cerebrovascular disease and frailty. Early ACP in the outpatient setting is important to allow high-risk patients to stay home with hospice care. Empathetic ACP before a crisis situation occurs is important |
| 34 | Roberts B, Wright SM, Christmas C, Robertson M, Wu DS<br>2020<br>Am J Hosp Palliat Care | USA | To develop a succinct and practical palliative care toolkit for use by primary care clinicians during the COVID19 pandemic | CAPC COVID-19 Response Resources. 2020.<br><a href="https://www.capc.org/toolkits/covid-19-response-resources">https://www.capc.org/toolkits/covid-19-response-resources</a><br><br>Respecting Choices COVID-19 Resources. 2020.<br><a href="https://respectingchoices.org/covid-19-resources/#planning-conversations">https://respectingchoices.org/covid-19-resources/#planning-conversations</a><br><br>Provides outline of the development of a practical and high-yield palliative care toolkit for use by clinicians caring for non-hospitalized patients during the COVID-19 pandemic, with support related to ACP communication skills and symptom management at the end of life |                                                        |                                                     | This article describes the development of a practical and high-yield palliative care toolkit for use by clinicians caring for non-hospitalized patients during the COVID-19 pandemic, with support related to ACP communication skills and symptom management at the end of life.                                                                |

|    |                                                                          |           |                                                                                                                                  |                                                                                                                                                                                                                                                                                                                                                                                                                                                                                                                                                                                                                       |                                                                                                                                         |                                                                                                                                            |                                                                                                                                                                                                                                                                                                                                                                                                                                                                                                                                                                                                                                                                                                                                                                                                                                                                                                                                                 |
|----|--------------------------------------------------------------------------|-----------|----------------------------------------------------------------------------------------------------------------------------------|-----------------------------------------------------------------------------------------------------------------------------------------------------------------------------------------------------------------------------------------------------------------------------------------------------------------------------------------------------------------------------------------------------------------------------------------------------------------------------------------------------------------------------------------------------------------------------------------------------------------------|-----------------------------------------------------------------------------------------------------------------------------------------|--------------------------------------------------------------------------------------------------------------------------------------------|-------------------------------------------------------------------------------------------------------------------------------------------------------------------------------------------------------------------------------------------------------------------------------------------------------------------------------------------------------------------------------------------------------------------------------------------------------------------------------------------------------------------------------------------------------------------------------------------------------------------------------------------------------------------------------------------------------------------------------------------------------------------------------------------------------------------------------------------------------------------------------------------------------------------------------------------------|
| 35 | Rosenberg AR, Popp B, Dizon DS, El-Jawahri A, Spence R 2020 J Clin Oncol | USA       | To advocate for early ACP in the COVID-19 era                                                                                    |                                                                                                                                                                                                                                                                                                                                                                                                                                                                                                                                                                                                                       | In the oncology setting; clinician fear of undermining hope or inducing a sense of abandonment, time needed to discuss ACP is too long. |                                                                                                                                            | Benefits of ACP; enable clinicians to advocate for patients, honour their preferences and fulfil their duty to provide the best medical care. Early ACP during COVID-19 is important; ACP facilitates goal-concordant end of life care, it directs resources according to patient preferences thus supporting fair resource allocation, it can reduce high-intensity care which relieves moral distress of clinicians, it enables patients to engage in shared decision-making.                                                                                                                                                                                                                                                                                                                                                                                                                                                                 |
| 36 | Sinclair C, Nolte L, White BP, Detering K 2020 Intern Med J              | Australia | To outline why ACP is an urgent priority, and should form a part of the health system's COVID-19 response strategy               | Key recommendations for health and aged care organisations and health practitioners to facilitate advance care planning (ACP) as part of the COVID-19 response<br><br>Australian Government Department of Health. Coronavirus (COVID-19) Advice for People in Aged Care Facilities. Canberra: Australian Government; 2020 Available from URL: <a href="https://www.health.gov.au/node/18602/coronavirus-covid-19-advice-for-people-in-residential-aged-care-facilities-and-visitors">https://www.health.gov.au/node/18602/coronavirus-covid-19-advice-for-people-in-residential-aged-care-facilities-and-visitors</a> |                                                                                                                                         | The prominence of COVID-19 illness and death in the media has forced the community to address ACP and is creating greater societal change. | ACP results in reduced use of life-sustaining treatments, increased compliance with patients' end of life wishes and reduced symptoms of depression and anxiety among bereaved relatives. During COVID-19;<br>- ACP can reduce the need for healthcare rationing by avoiding aggressive treatment of those who do not want it. Also reduces clinician exposure to unnecessary infection risk.<br>- Proactive ACP assists planning for surges in healthcare demand<br>- ACP respects human rights and can prevent unnecessary and unwanted hospital admissions, periods of self-isolation, the risk of dying alone and reduce the risk of transmission.<br>- ACP facilitates best understanding of one's values and preferences for health care, thus enabling proactive care coordination. Table 1 lists key recommendations for health and aged care organisations and health practitioners to facilitate ACP as part of the COVID-19 response |
| 37 | Singh AG, Deodhar J, Chaturvedi P 2020 Head Neck                         | India     | To define the ways in which the head and neck cancer services can contribute to better patient care in a COVID-19 triage context | Worldwide Hospice and Palliative Care Alliance: <a href="http://www.thewhpca.org/covid-19">http://www.thewhpca.org/covid-19</a><br><br>International Association of Hospice and Palliative Care (IAHPC) Palliative Care and Covid-19: <a href="http://globalpalliativecare.org/covid-19/">http://globalpalliativecare.org/covid-19/</a><br><br>COVID-19 Communication Tools from: <a href="https://docs.google.com/document/d/1uSh0FeY">https://docs.google.com/document/d/1uSh0FeY</a>                                                                                                                               |                                                                                                                                         | Palliative care providers also have a role in coaching frontline health staff to conduct ACP discussions.                                  | During the pandemic, education and counselling is key. Exploring and documenting goals of care and treatment preferences is crucial. One approach is "three talk" which includes team talk, option talk and decision talk.                                                                                                                                                                                                                                                                                                                                                                                                                                                                                                                                                                                                                                                                                                                      |

|    |                                                                         |     |                                                                                                                                  |                                                                                                                                                                                                                                                                                                                                                                                                                                                                                                                                                                                                                                                                                                                            |  |  |                                                                                                                                                                                                                                                                                                                                                                                                                                                                                                                                                                                                                                                                                                             |
|----|-------------------------------------------------------------------------|-----|----------------------------------------------------------------------------------------------------------------------------------|----------------------------------------------------------------------------------------------------------------------------------------------------------------------------------------------------------------------------------------------------------------------------------------------------------------------------------------------------------------------------------------------------------------------------------------------------------------------------------------------------------------------------------------------------------------------------------------------------------------------------------------------------------------------------------------------------------------------------|--|--|-------------------------------------------------------------------------------------------------------------------------------------------------------------------------------------------------------------------------------------------------------------------------------------------------------------------------------------------------------------------------------------------------------------------------------------------------------------------------------------------------------------------------------------------------------------------------------------------------------------------------------------------------------------------------------------------------------------|
|    |                                                                         |     |                                                                                                                                  | <p><a href="https://www.capc.org/toolkits/covid-19-response-resources/">dkGgHsZqem552iC0KmXlgaGKohI7SoeY2UXQ/preview</a></p> <p>Center to Advance Palliative Care (CAPC) COVID-19 Toolkit: <a href="https://www.capc.org/toolkits/covid-19-response-resources/">https://www.capc.org/toolkits/covid-19-response-resources/</a></p> <p>American Academy of Hospice and Palliative Care COVID-19 Resource: <a href="http://aahpm.org/education/covid-19-resources">http://aahpm.org/education/covid-19-resources</a></p>                                                                                                                                                                                                     |  |  |                                                                                                                                                                                                                                                                                                                                                                                                                                                                                                                                                                                                                                                                                                             |
| 38 | Wallace CL, Wladkowski SP, Gibson A, White P 2020 J Pain Symptom Manage | USA | To describe the relationship of the COVID-19 pandemic to different types of grief for individuals, families, and their providers | <p>Resources</p> <p>Contexts of Grief Amid Rapid Changes/Impact Due to COVID-19 and Recommendations to Mitigate Grief</p> <p>Halpern J. Working with families facing undesired outcomes during the COVID-19 crisis. Available from SWHPN website at <a href="https://swhpn.memberclicks.net/assets/01%20Working%20With%20Families%20Undesired%20Outcomes%20COVID19.pdf">https://swhpn.memberclicks.net/assets/01%20Working%20With%20Families%20Undesired%20Outcomes%20COVID19.pdf</a>.</p> <p>Center to Advance Palliative Care. CAPC COVID-19 response resources. Available from <a href="https://www.capc.org/toolkits/covid-19-response-resources/">https://www.capc.org/toolkits/covid-19-response-resources/</a>.</p> |  |  | <p>Unique aspects of the COVID-19 pandemic have the potential to cause complicated grief, such as physical distancing, visitor restrictions and social isolation, as well as the multiple losses in one family. Lock-down restrictions, prohibiting funeral services can contribute to disenfranchised and unresolved grief. Widespread anxiety and fear creates anticipatory grief for the community. HCW are at risk of moral distress associated with burnout, emotional exhaustion, depersonalisation and dehumanisation of their patients and families. However, quality communication, ACP and clinician self-care are three ways to address the changing landscape of grief in the COVID-19 era.</p> |

|  |  |  |  |                                                                                                                                                                                                                                                                                                                                                                                                                                                                                                                                                                                                                                                                                                                                                                                                                                                                                                                                                                                                                                                                                                                 |  |  |
|--|--|--|--|-----------------------------------------------------------------------------------------------------------------------------------------------------------------------------------------------------------------------------------------------------------------------------------------------------------------------------------------------------------------------------------------------------------------------------------------------------------------------------------------------------------------------------------------------------------------------------------------------------------------------------------------------------------------------------------------------------------------------------------------------------------------------------------------------------------------------------------------------------------------------------------------------------------------------------------------------------------------------------------------------------------------------------------------------------------------------------------------------------------------|--|--|
|  |  |  |  | <p>Respecting choices. COVID-19 resources. Available from <a href="https://respectingchoices.org/covid-19-resources/">https://respectingchoices.org/covid-19-resources/</a></p> <p>National Hospice &amp; Palliative Care Organization. Corona-virus disease 2019 (COVID-19) shared decision-making tool.2020. Available from <a href="https://www.nhpco.org/wp-content/uploads/COVID-19-Shared-Decision-Making-Tool.pdf">https://www.nhpco.org/wp-content/uploads/COVID-19-Shared-Decision-Making-Tool.pdf</a></p> <p>Centers for Disease Control and Prevention. Coronavirus Disease 2019 (COVID-19). 2020. Available from <a href="https://www.cdc.gov/coronavirus/2019-ncov/prepare/managing-stress-anxiety.html">https://www.cdc.gov/coronavirus/2019-ncov/prepare/managing-stress-anxiety.html</a></p> <p>American Academy of Hospice and Palliative Medicine. Resilience and well-being. Available from <a href="http://aahpm.org/career/resilience-and-well-being">http://aahpm.org/career/resilience-and-well-being</a></p> <p>University at Buffalo School of Social Work. Self-care starter kit.</p> |  |  |
|--|--|--|--|-----------------------------------------------------------------------------------------------------------------------------------------------------------------------------------------------------------------------------------------------------------------------------------------------------------------------------------------------------------------------------------------------------------------------------------------------------------------------------------------------------------------------------------------------------------------------------------------------------------------------------------------------------------------------------------------------------------------------------------------------------------------------------------------------------------------------------------------------------------------------------------------------------------------------------------------------------------------------------------------------------------------------------------------------------------------------------------------------------------------|--|--|

|    |                                                       |     |                                                                                               |                                                                                                                                                                                                                                                                                                                                            |                                                                                                                                                      |                                                                                                                                                                                                                                                                                                                                                            |                                                                                                                                                         |
|----|-------------------------------------------------------|-----|-----------------------------------------------------------------------------------------------|--------------------------------------------------------------------------------------------------------------------------------------------------------------------------------------------------------------------------------------------------------------------------------------------------------------------------------------------|------------------------------------------------------------------------------------------------------------------------------------------------------|------------------------------------------------------------------------------------------------------------------------------------------------------------------------------------------------------------------------------------------------------------------------------------------------------------------------------------------------------------|---------------------------------------------------------------------------------------------------------------------------------------------------------|
|    |                                                       |     |                                                                                               | Available from <a href="http://socialwork.buffalo.edu/resources/self-care-starter-kit.html">http://socialwork.buffalo.edu/resources/self-care-starter-kit.html</a>                                                                                                                                                                         |                                                                                                                                                      |                                                                                                                                                                                                                                                                                                                                                            |                                                                                                                                                         |
| 39 | Xu Y, Zhang LK, Smeltz RL et al 2021<br>J Palliat Med | USA | To describe the palliative care needs during a New York City public hospital's COVID-19 surge | Orientation Manual with Essential Information Given to All Volunteers during Onboarding<br><br>VitalTalk. COVID resources.<br><a href="https://www.vitaltalk.org/covid-resources/">https://www.vitaltalk.org/covid-resources/</a><br><br><a href="https://www.vitaltalk.org/vitaltalk-apps/">https://www.vitaltalk.org/vitaltalk-apps/</a> | Phone conversations prevent non-verbal cues, visitor restrictions cause distress for families, overseas families lack technology to video-conference | Utilising social workers and spiritual carers to facilitate daily video calls with families. Volunteers (psychiatrists, physicians, paediatrician) were utilised for goals of care discussions, medical updates and family support in the ICU setting. 50% of patients were non-English speaking, requiring close collaboration with interpreter services. | During the pandemic, the palliative care workload grew 350% requiring quick adaptation of the service which involved surge staffing, support and scale. |
